# Supplementary material
Source: publisher figshare collection journal article supplement (https://gsajournals.figshare.com/ndownloader/files/35373757)
Supplement: Supplementary file 1 [file 35373757]

## Sheet: Supplementary Table S3
Supplementary Table S3. Transformed best linear unbiased estimators (BLUEs) (μg g–1) of nine tocochromanol grain phenotypes in the Ames panel
Accession number	Inbred line name	αT	δT	γT	ΣT	αT3	δT3	γT3	ΣT3	ΣTT3
Ames10249	GA212	2.20644	1.14494	5.34354	5.58302	2.56546	-1.1052	2.69697	2.51405	6.69274
Ames10252	GA222	2.56747	1.18682	5.91673	6.31025	3.56746	-0.605115	3.52397	3.18177	7.97781
Ames10254	GE54	2.92497	0.917468	2.87439	3.73647	3.9294	-0.269686	4.18452	3.46434	6.79761
Ames10255	GE72	2.26807	0.845478	2.93643	3.24067	3.10097	-1.03796	2.9575	2.81947	5.27461
Ames10256	GE129	1.29269	1.28959	6.58352	6.5538	2.75594	-1.04992	4.95366	3.42535	8.59618
Ames10261	GE335	3.92318	0.786634	4.47708	5.71512	3.64876	-0.30603	4.53098	3.48767	8.08259
Ames10265	L 678	2.04154	1.27238	6.93708	7.12187	2.73153	-2.85643	2.74628	2.59965	7.9948
Ames10271	SC84E	1.63202	0.870382	5.22675	5.28913	2.8943	-0.124511	3.88055	3.11946	7.14453
Ames10272	SC90	2.78874	1.54027	6.99743	7.46732	3.00599	1.1026	6.25023	3.91812	10.2905
Ames10273	SC102	3.43217	1.18956	5.27585	6.13831	4.02422	-0.854312	2.69005	3.11632	7.74514
Ames10274	SC144	4.23404	2.02491	7.7839	8.91	3.5401	1.04658	4.4815	3.5213	10.6362
Ames10277	SC235	2.73415	1.01414	4.30959	4.87178	2.79077	-0.304118	3.81647	3.06857	6.71098
Ames10287	ABPl 3	1.71663	0.523469	3.08528	3.06747	2.45729	-0.481286	4.11293	3.08255	5.61131
Ames12727	NC83	2.5432	0.76308	3.13725	3.67648	2.69122	-0.25535	3.60366	2.95535	5.73475
Ames12728	NC220	3.09993	2.02534	7.88466	8.50708	3.91858	-1.17975	3.20935	3.17746	9.82067
Ames12729	NC222	4.02352	0.838426	3.9179	5.37873	3.41364	-1.46762	2.28549	2.73986	6.66426
Ames12730	NC224	1.54262	1.97069	7.34692	7.51375	2.79405	-0.345862	3.54221	2.97544	8.69988
Ames12731	NC230	2.18168	2.14592	7.28341	7.67788	2.28692	0.0142629	4.62125	3.24733	9.21758
Ames12740	NC248	2.4165	1.43241	6.46335	6.81771	2.65546	0.138072	4.49243	3.28405	8.57082
Ames12814	89S4083	3.19757	1.61822	6.28597	6.98987	2.54444	-0.484117	3.51204	2.87034	8.21768
Ames12815	89S4098	2.78251	2.18183	8.49573	9.06322	3.37133	0.334923	6.96492	4.089	11.9361
Ames12816	89S4107	3.91462	1.05601	5.81725	6.82787	2.91878	-0.388375	3.16686	2.85852	8.01507
Ames12817	89S4110	1.67519	0.709784	4.7746	4.79701	2.27193	-0.628327	2.8603	2.48942	5.93889
Ames12818	89S4117	4.2513	1.88208	7.32034	8.47401	3.75886	0.579867	5.42409	3.77301	10.7783
Ames12819	89S4125	1.96984	1.29213	6.30708	6.51162	1.94935	-0.470842	3.29916	2.66953	7.5359
Ames12820	89S4127	1.97666	1.17915	5.5879	5.75623	2.35772	-0.76666	2.99968	2.5824	6.88346
Ames12822	89S4154	1.53245	1.06298	5.58219	5.59346	2.39285	-0.893086	4.36636	3.09813	7.34781
Ames12823	89S4157	1.62146	1.44742	NA	6.55517	2.45502	-0.849067	4.763	3.31127	8.41556
Ames12824	89S4190	3.80318	1.14968	5.74521	6.77408	3.04394	-1.20236	3.90469	3.14346	8.32633
Ames14112	Va3A	3.08253	0.966147	5.02855	5.65123	3.13597	0.277927	4.66797	3.45234	8.01542
Ames14113	Va12C	1.89362	1.58504	7.20546	7.40644	2.30095	-0.379936	3.77598	2.92255	8.57889
Ames14114	Va14A	2.55382	0.890153	3.62415	4.1305	2.89663	-0.966094	3.63551	3.01022	6.16146
Ames14115	Va35C	1.68971	0.985921	5.09982	5.19669	2.39822	-1.01106	4.20739	3.09809	7.07055
Ames14116	Va36A	2.72631	1.18899	6.11375	6.53768	3.63301	-1.16071	4.52488	3.4726	8.70346
Ames14211	EAST 028 WHITE COB	2.30102	2.1886	8.91409	9.2915	2.05217	0.349374	4.00256	2.9828	10.3208
Ames18999	Ab28A	2.28316	NA	9.79769	10.3199	2.65544	1.61926	3.69768	3.18676	11.4179
Ames19000	VaW6	3.22943	1.07676	5.78642	6.48096	2.59626	-1.56646	3.41113	2.82713	7.68413
Ames19001	Va16	1.83343	1.9165	8.36057	8.57841	2.25911	0.065459	4.98822	3.37391	10.1725
Ames19002	Va17	1.12655	1.50589	8.05655	8.06658	3.55286	-1.4369	4.58272	3.46655	9.87722
Ames19003	Va18A	2.24877	0.829548	4.48015	4.69537	2.45478	-1.29006	2.74052	2.4709	5.89819
Ames19004	Va21A	0.975346	1.06697	3.85432	3.61001	1.51124	1.24497	7.38413	4.11867	8.61032
Ames19006	Va22B	1.78565	1.63653	6.3822	6.56797	2.1304	-1.44044	3.88016	2.88759	7.84645
Ames19007	Va23	1.2913	1.38627	6.34882	6.33772	2.17864	-0.657894	4.39856	3.12492	7.9611
Ames19008	Va24	1.51329	1.85424	8.54134	8.682	3.56362	-0.261955	5.71925	3.82294	11.0191
Ames19009	Va30	2.6544	1.41909	6.8744	7.28013	3.821	-1.06179	5.47443	3.76322	9.81499
Ames19010	Va37	2.2126	2.03633	7.35806	7.74869	2.76163	1.25843	9.60121	4.62224	12.7231
Ames19011	Va38	2.99586	1.18091	5.14406	5.76996	2.43544	-1.5508	2.54047	2.39716	6.66265
Ames19012	Va39	1.77105	1.82447	7.99528	8.20533	2.7263	-1.36829	3.55163	2.92303	9.29782
Ames19013	Va46	2.5444	1.41957	9.25833	9.52645	3.58845	-0.448206	5.18464	3.64975	11.3798
Ames19014	Va52	1.44557	1.20826	6.86583	6.89023	2.29699	-0.8246	3.29976	2.70265	7.96327
Ames19016	Va59	1.52173	0.998527	4.80272	4.80054	2.54357	-0.738951	4.45699	3.21723	6.94573
Ames19017	Va60	1.66507	1.06729	5.99407	6.02068	3.77375	-0.361165	5.41731	3.75467	8.92597
Ames19019	Va91	1.2142	1.68991	8.26621	8.36173	3.59318	0.668925	5.97866	3.8917	10.9125
Ames19283	B37 TRf	3.42671	1.12471	5.46303	6.31537	2.89928	-1.03704	2.93626	2.7507	7.51611
Ames19284	C103	2.58451	1.0982	5.19424	5.60048	2.20693	-1.19287	3.15639	2.59832	6.71419
Ames19287	Mo17TRf	2.9225	1.33832	6.08413	6.63863	2.41112	-1.57503	2.87637	2.53047	7.55454
Ames19288	Oh43	3.32002	1.19312	8.33746	8.84139	3.25011	-0.561143	5.82938	3.77444	11.0498
Ames19293	Wf9	1.80416	1.75015	8.87765	9.07787	2.52019	0.455076	4.14474	3.15733	10.324
Ames19308	A634	3.43903	1.0428	5.91797	6.64903	3.05071	-0.958854	4.31581	3.31171	8.47936
Ames19309	A635	3.58381	0.785766	3.83744	4.99234	4.01883	0.139938	3.68398	3.38297	7.40606
Ames19313	C123	2.95912	1.086	4.86295	5.48905	2.56937	-1.11704	2.509	2.44182	6.51609
Ames19316	CM174	2.38234	3.16e-05	3.16e-05	1.3366	2.6541	0.127695	5.29057	3.5294	6.07232
Ames19318	H107	3.07174	1.60706	8.08533	8.58999	3.26728	-1.18572	3.38253	3.03274	9.77384
Ames19319	H95	2.86277	1.42023	7.62722	8.09287	2.18203	0.0123525	4.83746	3.31706	9.69458
Ames19321	N28	3.28953	1.03144	5.41798	6.15236	2.92376	-2.04674	2.41816	2.55171	7.17245
Ames19323	Oh7B	1.5052	2.20782	7.79954	8.00592	2.2207	-0.137533	5.59053	3.52885	9.94195
Ames19324	Pa871	3.61185	1.6646	8.27612	9.01056	3.24103	-0.267856	3.9767	3.23231	10.3464
Ames19326	R168	3.03299	1.28348	5.5554	6.15709	2.73951	-0.786421	2.8427	2.66739	7.26154
Ames19327	Tx303	2.04777	1.85826	8.31596	8.55928	2.33241	0.922581	5.90643	3.72649	10.6909
Ames19328	Va22	1.69169	1.74758	7.46502	7.62012	2.42567	-1.7316	3.16448	2.57996	8.49585
Ames19330	W182B	1.75361	1.65096	6.60653	6.76995	1.77164	-0.111428	5.21653	3.38396	8.72615
Ames20118	Mo25W	1.42986	0.845465	3.68619	3.57494	2.00486	0.480476	4.09118	3.03754	5.86365
Ames20120	Mo42	3.23334	1.79871	7.41921	8.13216	2.78832	-0.472581	3.69316	3.0098	9.32239
Ames20136	H21W	1.97835	0.82581	4.97461	5.0963	2.2852	-0.140822	2.97943	2.59995	6.29767
Ames20137	H25W	2.44184	1.60172	6.33768	6.75224	2.52124	0.501379	5.22384	3.53039	8.91715
Ames20140	Mt42	2.94179	1.44416	7.60061	8.04242	3.3762	0.56914	7.22911	4.14881	11.3599
Ames21095	R12	1.30674	0.765577	4.87	4.76465	2.39461	-0.737347	2.18316	2.23379	5.63882
Ames21096	R35	1.92597	1.90113	7.68572	7.92967	3.17002	0.745705	4.68124	3.48216	9.77695
Ames21512	CI31A	2.35925	1.66251	7.18203	7.52019	2.63162	-0.481402	4.78448	3.36025	9.25287
Ames22441	CH157	1.88881	3.65899	8.83907	9.58215	2.48484	1.66529	6.68319	3.99619	12.1131
Ames22442	Ms100	1.95354	2.27129	8.80563	9.08341	2.79101	0.595216	5.55338	3.65865	11.0281
Ames22747	CM48	2.81969	0.467851	2.84351	3.59815	2.52299	-0.502377	2.15346	2.30058	4.84559
Ames22748	H100	3.79826	1.27224	6.95173	7.84643	3.81976	-0.241344	5.47254	3.77752	10.2774
Ames22750	H112	3.00891	2.1194	8.0048	8.65089	3.10009	-0.471341	3.04482	2.87845	9.63703
Ames22751	H114	1.20559	1.61823	7.91736	7.94753	2.61093	-0.470399	5.09192	3.45158	9.76964
Ames22752	H119	3.12589	1.32205	5.24175	5.9709	3.56973	0.339222	5.51197	3.75632	8.8904
Ames22753	H123	2.77632	1.2171	5.36603	5.92021	3.229	-0.578365	5.15665	3.58148	8.4382
Ames22754	K55	2.31175	1.49664	8.14867	8.39366	2.69694	-0.623928	4.24509	3.17066	9.71986
Ames22756	Os426	2.95089	1.51623	6.51842	7.12388	2.61445	-0.303937	2.82887	2.63313	8.04588
Ames22757	Pa405	2.04774	1.28835	5.67401	5.89943	2.58506	-0.150291	5.56753	3.61708	8.50653
Ames22759	Tx29A	2.07542	1.72779	7.28577	7.55145	2.47401	-0.545704	3.73986	2.97191	8.73656
Ames22760	Tx71	3.08091	1.81873	9.14759	9.65041	2.37685	-1.0397	4.32372	3.13641	10.7782
Ames22762	Tx118	2.85257	0.986591	4.58796	5.19996	2.45873	-1.23874	3.73012	2.91796	6.77789
Ames22765	Tx738	2.4661	1.13859	5.01176	5.40445	3.03854	-1.02461	3.42634	2.97689	7.00221
Ames22766	Tx817w	4.56058	1.21982	6.32193	7.69947	2.74576	-0.553439	3.22942	2.84914	8.71926
Ames22767	W59E	1.98646	1.32523	7.21303	7.36654	2.54659	-0.906228	4.17746	3.1101	8.79061
Ames22792	ABPl 2	1.97743	0.583663	2.55712	2.73785	3.3189	-0.519236	3.40654	3.08055	5.38073
Ames22793	ABPl 4	1.32186	0.74195	2.97743	2.76457	3.76634	-0.175043	5.52423	3.78434	7.16926
Ames22794	ABPl 5	1.88185	0.582648	3.11565	3.19684	2.91062	-0.725762	4.97433	3.46273	6.50709
Ames2327	Lai 1029	3.47468	1.04597	5.13311	6.05938	2.97386	-1.08402	3.35523	2.93437	7.46428
Ames2328	North 7	2.59914	0.507223	3.5291	4.09191	2.20166	-1.60934	2.83702	2.43695	5.3922
Ames2329	SW 322	3.33646	1.05211	5.96617	6.63461	2.65651	0.0290029	4.7976	3.37395	8.62959
Ames2330	East 028	1.80045	1.78264	6.97872	7.2001	1.85997	1.11553	5.27448	3.48607	9.22694
Ames2331	Yellow 3-4	2.26538	1.36599	7.0113	7.26352	2.20652	-1.64268	2.26579	2.1109	7.84677
Ames2332	Bei 10 = North 10	2.16469	1.13665	6.87601	7.0718	2.32217	1.03155	5.68888	3.66094	9.47494
Ames2333	Yong 28	2.8126	1.3859	5.09089	5.69705	3.15245	-0.446297	3.10408	2.92282	7.20049
Ames2334	Yong 28 (br2)	2.79655	1.18919	4.77566	5.3764	3.0212	-0.712003	2.84761	2.78038	6.7445
Ames2335	Ye 4	3.36634	1.60256	5.53759	6.4437	3.19063	-0.479974	3.6261	3.10362	8.03455
Ames2336	52220	3.12563	1.58675	4.59855	5.47827	3.44939	0.326277	4.77271	3.52776	8.03341
Ames2337	Huanyao	3.13668	1.52562	5.23549	6.07629	2.98244	-0.194162	3.03114	2.85719	7.41394
Ames2338	(Twan x Tzuh)-S6	2.89568	1.35372	8.01301	8.43722	2.65856	-0.767893	3.37043	2.85161	9.43793
Ames23389	A15	2.46263	1.3611	7.28073	7.6137	3.47324	-0.580692	4.5733	3.45614	9.48965
Ames2339	Huobai	3.2999	1.61018	6.79114	7.51313	3.35557	-0.197519	3.68348	3.17018	8.96578
Ames23391	A34	2.89675	2.5677	7.69628	8.39821	2.56731	0.253477	4.49667	3.27289	9.86852
Ames23392	A90	3.08371	1.77114	7.7759	8.39382	2.35654	-0.557295	3.59042	2.87562	9.40368
Ames23393	A96	2.5191	2.93152	11.3167	11.8154	2.56945	0.937212	4.71571	3.38084	13.0119
Ames23394	A116	3.60857	0.934449	6.0579	6.85508	1.72459	-2.78705	1.35492	1.23047	7.11595
Ames23395	A152	3.58155	1.26896	7.46151	8.172	3.01622	-1.89795	3.55939	2.9991	9.33051
Ames23396	A155	2.96455	1.17169	6.87751	7.3352	3.16341	-0.951345	4.72393	3.43157	9.24464
Ames23397	A158	1.91886	1.31012	6.12426	6.31966	2.52487	-0.476908	4.99561	3.4065	8.39745
Ames23398	A166	2.65618	2.27351	7.56234	8.11879	2.78213	0.673427	5.9947	3.78195	10.5053
Ames23399	A201	4.50113	1.19971	7.80262	8.90268	4.11056	-0.963248	3.50167	3.33383	10.3909
Ames2340	WFg 3-9	2.51325	1.232	6.30678	6.62042	2.86264	1.19388	5.69343	3.74412	9.32744
Ames23400	A203	3.79097	1.36803	7.95972	8.73122	3.60765	-0.840852	3.40654	3.15614	9.9958
Ames23401	A204	3.64596	0.810205	5.85384	6.70447	3.19429	-2.18424	3.79717	3.14097	8.28724
Ames23402	A208	3.87893	1.11382	7.0772	7.94631	3.46433	-1.41704	3.50951	3.13428	9.27951
Ames23403	A218	2.27629	2.75389	9.24208	9.74949	2.7751	-1.27706	4.3583	3.22508	10.9822
Ames23404	A223	2.01793	2.76902	8.50849	9.01718	2.07416	0.0755097	4.10259	3.0299	10.1391
Ames23405	A239	2.55051	2.00571	8.75368	9.14177	2.6844	-0.345896	4.1216	3.15139	10.325
Ames23406	A251	1.71672	1.04608	5.93012	5.99959	2.69726	-1.49706	3.10415	2.74624	7.24201
Ames23407	A257	3.01571	1.72539	10.5122	10.9172	1.92247	-0.13099	3.61594	2.75962	11.6478
Ames23408	A260	1.83422	1.10516	7.11322	7.19545	1.90288	-0.341398	6.12899	3.69516	9.62468
Ames23409	A264	1.84577	1.90255	6.22222	6.51649	2.24687	1.49774	5.6582	3.6873	9.11116
Ames2341	S330	3.50183	1.20989	7.29625	7.96416	2.91703	-0.937597	4.24605	3.25456	9.44505
Ames23410	A265	3.29957	1.80198	8.82174	9.41545	2.36212	-1.03028	2.98751	2.57398	10.1401
Ames23413	A286	1.88699	1.83953	7.91309	8.14888	2.4879	0.226735	5.03189	3.44253	9.93365
Ames23414	A288	2.15202	1.16543	6.80514	7.00131	2.37627	-0.405589	5.93447	3.69043	9.46751
Ames23415	A295	2.30982	2.06888	7.3886	7.81865	2.65496	0.40415	7.17875	4.0764	10.9858
Ames23417	A305	2.10255	1.11823	7.53248	7.67558	1.81203	-0.902849	4.48746	3.09677	9.02145
Ames23418	A308	2.77839	2.24061	9.67176	10.1406	3.03077	0.729894	6.12569	3.85028	12.2544
Ames23419	A310	2.00411	1.55981	6.86246	7.11266	1.86573	0.595642	3.79536	2.8996	8.34526
Ames23420	A312	2.19758	1.71779	5.8644	6.2514	2.2554	0.416519	5.77808	3.65079	8.85699
Ames23421	A321	2.00571	1.78878	7.61712	7.87634	2.03663	0.140936	3.49746	2.76279	8.86838
Ames23422	A322	2.48271	1.87812	7.47852	7.86753	2.66067	NA	6.25501	4.01825	10.8641
Ames23423	A334	1.67145	1.94265	5.85154	6.06766	2.33486	1.89326	5.67664	3.75809	8.94245
Ames23424	A340	2.29269	1.2519	4.80883	5.14383	1.89902	0.365163	4.47517	3.16001	7.10909
Ames23425	A344	2.18607	1.05601	5.87968	6.09835	2.34411	-0.728875	4.45826	3.18065	7.87715
Ames23426	A357	2.06985	1.8956	7.91588	8.19773	2.39174	0.202729	4.72366	3.32519	9.78433
Ames23427	A374	2.0825	1.69087	5.53144	5.89499	2.25075	0.540439	4.24255	3.13995	7.64684
Ames23428	A375	1.80761	0.756801	3.72661	3.81919	1.97949	-0.409247	3.78434	2.87161	5.68863
Ames23429	A385	2.78268	1.46469	7.85195	8.26687	2.50617	-1.58044	1.80372	2.02823	8.73842
Ames23430	A401	3.41548	1.53734	7.62027	8.30872	2.8212	0.872747	4.91976	3.49819	10.1553
Ames23431	A407	2.66404	0.795788	4.11163	4.67753	2.84368	-1.17602	3.8666	3.07705	6.6458
Ames23433	A422	3.12439	1.31342	7.87578	8.37028	2.2237	-2.10922	1.77856	1.86649	8.76439
Ames23434	A424	1.95374	1.32082	7.37145	7.51209	2.84915	-1.34675	2.92194	2.68922	8.46467
Ames23435	A427	2.92937	0.928607	4.50047	5.12632	2.24033	-0.934929	2.06975	2.08333	5.90376
Ames23436	A449	1.63526	0.5939	2.45624	2.35738	2.17894	-0.513435	4.25951	3.08272	5.25798
Ames23437	A450	2.08825	1.57301	7.72807	7.94612	2.51572	-1.5398	3.68859	2.90987	9.03828
Ames23438	A451	1.96663	0.663602	3.79913	3.83523	2.74445	1.07871	4.81689	3.46893	6.88038
Ames23439	A480	2.50307	1.03308	7.37894	7.65796	3.18417	0.0987018	5.76883	3.74936	10.0802
Ames23440	A495	1.95847	1.85818	8.99772	9.21534	2.29726	-0.6658	4.457	3.17079	10.4733
Ames23441	A497	2.57139	1.66806	6.6596	7.12628	3.19693	-0.871394	3.92138	3.20017	8.7023
Ames23442	A498	2.09109	1.34133	7.14925	7.34738	2.90278	-0.441355	5.35102	3.58399	9.51425
Ames23443	A499	2.04364	1.45456	7.45478	7.64067	2.82578	-1.07175	4.75711	3.36571	9.39075
Ames23444	A500	2.70612	1.19615	6.83575	7.23633	3.40395	-0.953614	3.65285	3.16738	8.75222
Ames23445	A502	1.87034	0.674095	3.90461	3.94605	2.29314	1.05712	3.78932	3.04705	6.06382
Ames23446	A508	2.83587	1.53807	7.00872	7.51298	2.69638	1.19738	5.96295	3.79094	10.0654
Ames23447	A509	2.9913	1.46764	6.85294	7.39595	2.49433	0.916817	5.71694	3.67935	9.73644
Ames23448	A547	1.72099	1.14117	4.81985	4.92937	2.58314	-1.03918	5.14159	3.45842	7.52099
Ames23449	A548	1.56634	0.522278	3.37967	3.25666	2.07605	-0.262735	4.58553	3.20305	5.97448
Ames23450	A556	1.81243	1.74071	6.92462	7.12526	1.55291	-1.61354	3.08152	2.34234	7.82846
Ames23451	A572	2.13001	0.991435	5.91175	6.09167	2.45649	-1.69116	2.86872	2.55339	7.10125
Ames23452	A575	2.30698	1.4814	7.0881	7.34501	1.99914	-1.8676	1.54221	1.54351	7.72159
Ames23455	A588	2.2681	1.66027	9.26456	9.50229	2.32473	-0.645665	5.83703	3.6426	11.3502
Ames23456	A617	3.01531	1.04514	5.05676	5.72923	2.48693	0.330825	3.53134	2.91701	7.20605
Ames23457	A618	2.74266	1.47794	6.69117	7.13959	2.39721	-1.32019	2.2233	2.24945	7.75499
Ames23458	A619HT	2.89285	2.27189	10.2214	10.6976	2.58167	0.731325	6.03666	3.77482	12.5853
Ames23459	A622	3.83872	1.35639	8.14739	8.92365	2.9935	-0.695773	3.48427	3.01103	10.0268
Ames23460	A624	2.14368	2.8081	8.50584	9.03705	2.86461	0.457109	6.60651	3.94647	11.5892
Ames23461	A625	1.88385	1.11919	7.52613	7.62483	2.41457	0.117796	6.34111	3.81948	10.2033
Ames23463	A627	3.60504	1.66214	6.37126	7.28165	2.51575	-0.0465478	3.22026	2.76244	8.31376
Ames23464	A628	3.48242	1.51954	6.48167	7.30606	2.77133	0.550156	2.95904	2.80939	8.40028
Ames23465	A629	1.86697	0.962475	5.75289	5.87984	2.88096	0.200498	4.72073	3.40502	8.06956
Ames23466	A630	1.51805	1.47282	8.15425	8.22089	2.84289	0.0737595	4.2005	3.24488	9.65843
Ames23467	A631	1.81861	1.18747	7.6313	7.74227	2.6419	0.71604	5.64536	3.67342	10.0103
Ames23468	A632HT	3.67002	0.917385	5.04685	6.02914	3.47869	-1.56381	3.08665	2.99461	7.51384
Ames23469	A632HTN	3.77619	0.737769	4.25365	5.41292	3.41917	-1.06792	3.16989	3.02003	7.08388
Ames23470	A632RpRp	3.71593	0.70338	3.49123	4.80011	2.83751	-1.7173	2.50152	2.55037	5.98323
Ames23471	A633	3.78976	1.09735	6.06313	7.03344	3.69828	-0.619284	3.76887	3.29674	8.77824
Ames23473	A635RpRp	3.57977	0.60673	2.56112	4.06426	3.44424	0.0791446	3.7863	3.23422	6.53562
Ames23474	A636	3.21319	0.615453	4.39171	5.10452	3.11046	-1.35026	3.19894	2.91776	6.69872
Ames23475	A637	1.88694	1.50349	5.47862	5.70397	1.88776	-0.361068	4.67549	3.19386	7.61465
Ames23476	A638	1.73148	0.88799	5.21262	5.25386	3.2888	0.386103	5.0175	3.58173	7.99498
Ames23477	A640	3.08034	0.853611	4.34202	5.07693	3.04456	-0.74832	3.05327	2.86691	6.64013
Ames23478	A643	2.06378	0.71327	4.29058	4.52464	2.42801	-0.644157	5.02554	3.41124	7.1803
Ames23479	A644	2.04091	2.3773	8.27589	8.67346	3.39564	-0.987773	4.10387	3.29819	10.1834
Ames23480	A645	2.52004	2.36681	9.36073	9.84435	2.07372	-1.03967	4.00436	2.95423	10.76
Ames23481	A646	2.29309	1.80457	9.39144	9.66753	2.17685	-1.1188	4.13013	3.01	10.6776
Ames23482	A649	1.86393	1.6682	7.22716	7.42794	2.29576	0.660814	4.40289	3.21007	8.95498
Ames23483	A650	2.67124	1.59099	7.64063	8.02913	2.38982	0.505604	3.94008	3.05158	9.28465
Ames23484	A651	NA	1.57285	6.13728	6.9918	2.77726	-0.300696	4.41417	3.26958	8.67838
Ames23485	A652	1.55287	1.40734	6.99193	7.04468	2.88402	-0.811328	2.81122	2.70846	8.04474
Ames23486	A653	3.10151	0.629303	4.22417	4.96439	2.88327	0.59432	5.77862	3.73463	8.17868
Ames23487	A655	2.11929	0.28643	1.24466	1.75445	3.11701	-0.27865	3.52204	3.0594	5.01424
Ames23488	A656	2.15525	0.988741	5.9507	6.14792	2.30295	-0.550112	5.68379	3.59867	8.64495
Ames23490	A666	2.11981	1.52901	8.06244	8.29441	2.73643	-0.533392	4.44426	3.25898	9.76939
Ames23491	A667	2.22559	2.52181	9.73107	10.1375	2.72617	0.762691	5.54505	3.6649	11.9163
Ames23492	A668	3.06106	1.38037	6.59802	7.17368	2.35533	0.0674986	2.97447	2.61484	8.09774
Ames23493	A669	3.57951	2.7184	10.7606	11.507	2.40525	-0.440211	3.38384	2.77456	12.2092
Ames23494	A670	3.17277	1.17831	7.41635	7.94649	2.65292	0.316784	5.3707	3.56534	9.94078
Ames23495	A671	2.52593	1.03026	5.34836	5.71542	2.45952	0.464889	5.91148	3.71296	8.56149
Ames23496	A672	3.52914	0.934524	6.58648	7.28778	3.664	-1.54722	2.72856	2.97187	8.55505
Ames23497	A673	1.81313	0.834861	5.37702	5.43223	2.74018	0.927874	6.08943	3.8194	8.72384
Ames23498	A674	3.66614	1.07687	6.06299	6.88751	3.69847	0.937155	5.34047	3.76384	9.51901
Ames23499	A675	2.84145	0.565675	2.66668	3.53881	2.7342	0.0504373	3.46108	2.92619	5.64664
Ames23500	A676	2.78343	0.865628	5.59884	6.03987	2.79549	-1.77747	4.04176	3.11394	7.6939
Ames23501	A677	3.01093	1.13518	8.50167	8.92566	2.74874	-0.228774	4.68966	3.35864	10.4478
Ames23502	A678	2.43312	1.786	NA	7.93361	2.95379	0.466877	5.16201	3.56785	9.96217
Ames23503	A680	2.65075	1.14511	4.83729	5.34754	3.58674	0.633445	6.1817	3.94009	8.93867
Ames23504	A681	3.36492	1.77256	6.97265	7.72573	3.57271	0.596187	5.87431	3.81823	10.2806
Ames23505	A683	1.91983	1.93954	7.57005	7.82915	1.92515	-0.720045	3.37206	2.64139	8.70715
Ames23922	Oh51A	1.60649	1.58968	7.90563	8.01633	3.04248	-0.40413	4.18602	3.25231	9.50054
Ames23924	Tx706	1.98596	1.43343	7.75562	7.92777	2.45201	-0.74774	3.72006	2.92518	9.04177
Ames24585	CG10	1.94741	1.31329	6.2035	6.38239	2.46616	1.49634	5.58043	3.68252	8.99791
Ames24589	I159	2.14493	2.03539	7.02174	7.39562	2.3704	-0.423373	4.96049	3.37939	9.17029
Ames24590	I198	2.45084	2.86688	9.4697	10.0309	2.82584	0.167134	6.01972	3.77706	12.0381
Ames24704	MS1	1.85584	0.625526	3.85745	3.92954	3.00601	0.465838	4.63692	3.4229	6.84876
Ames24705	MS4	2.62744	1.64993	6.77158	7.24249	3.02158	-0.282158	3.94104	3.18001	8.7911
Ames24706	MS12	1.89575	1.96744	8.69474	8.94772	2.11033	-0.445284	4.39269	3.12205	10.1689
Ames24707	MS24	1.86794	1.26605	6.55948	6.69006	2.56088	-0.35791	3.56746	2.90794	7.97767
Ames24708	MS24A	2.02363	1.92864	7.98598	8.25938	2.63456	0.918744	4.99703	3.49184	10.0776
Ames24709	MS57	2.75234	0.57715	4.61011	5.05887	2.54149	0.294253	4.17723	3.14187	7.03751
Ames24710	MS67	2.24986	1.8921	8.2297	8.58207	2.61598	0.82624	4.36277	3.28038	10.06
Ames24711	MS68	1.53612	1.39051	6.82193	6.89448	2.63648	-0.0744857	3.12279	2.76583	7.98153
Ames24712	MS71	3.21132	1.26134	7.05609	7.65019	3.14622	-1.07375	3.64623	3.09638	9.02376
Ames24713	MS72	2.30914	1.71392	7.92773	8.22956	2.34615	0.257684	4.58595	3.25607	9.66363
Ames24714	MS74	2.35017	1.21901	6.61742	6.92026	1.92606	-1.70601	3.11216	2.46461	7.76333
Ames24715	MS75	2.38119	0.634194	3.32341	3.72653	2.90058	-0.666187	6.28163	3.84421	7.81891
Ames24716	MS76	3.5195	1.0003	4.3776	5.44679	2.75716	-0.751004	2.78378	2.65598	6.63504
Ames24717	MS77	3.59543	1.35881	4.62985	5.78095	2.98831	-0.373088	3.35502	2.95354	7.28536
Ames24718	MS78	1.85465	1.50622	9.26296	9.38386	2.77208	-0.354819	5.59619	3.63363	11.2508
Ames24719	MS79	2.96242	1.3529	8.71084	9.13303	2.94378	-0.215538	5.43043	3.62427	11.0239
Ames24720	MS80	2.23712	0.608166	3.62027	3.90378	2.5588	0.208279	4.37743	3.23336	6.35677
Ames24722	MS89	2.70968	1.28434	6.40515	6.81617	2.41722	0.244614	4.93708	3.3962	8.77103
Ames24723	MS91	1.90191	0.8999	5.84641	5.97053	1.97652	-0.0902884	4.13233	3.01125	7.54283
Ames24724	MS92	2.71289	0.721591	3.50806	4.11165	2.98733	-0.713926	3.74537	3.08497	6.26796
Ames24725	MS93	2.88249	1.5973	4.52003	5.28086	2.61266	0.307395	4.31529	3.2235	7.32094
Ames24726	MS100	1.95504	NA	7.92732	8.27022	2.41257	0.80303	5.46656	3.59583	10.2397
Ames24727	MS106	1.4124	0.801398	4.00415	3.90324	2.85871	0.998484	4.61295	3.41956	6.74941
Ames24728	MS107	1.91542	1.16133	7.96614	8.04475	2.41175	-0.800966	3.55637	2.86129	9.03243
Ames24729	MS116	1.95782	1.00631	5.4816	5.65354	2.31682	-1.6297	2.41973	2.28822	6.51283
Ames24730	MS132	1.98428	1.47688	7.22651	7.40515	2.84235	-0.530114	5.18998	3.52334	9.4381
Ames24732	MS141	2.28323	1.27169	7.62843	7.87028	2.69822	0.210891	5.84953	3.71957	10.1895
Ames24733	MS142	2.11928	0.845765	5.71382	5.85932	2.28164	0.131256	5.42749	3.53585	8.29482
Ames24734	MS153	1.95755	1.62058	7.0545	7.22769	2.28719	0.559662	4.42309	3.21358	8.80857
Ames24735	MS198	3.10228	2.15418	8.55492	9.20699	3.40656	1.03967	7.80385	4.29997	12.5946
Ames24736	MS199	1.57049	0.934297	5.64817	5.65271	2.37819	-0.168474	3.42881	2.80372	6.97312
Ames24737	MS200	3.38561	1.11442	6.00463	6.79429	3.37869	0.858353	3.89053	3.3082	8.62193
Ames24738	MS201	2.81642	1.15436	5.6764	6.17738	2.53668	-0.313114	3.86933	3.02075	7.68638
Ames24739	MS203	2.99764	1.04403	4.62388	5.29154	2.21364	-1.4404	2.9655	2.48158	6.33748
Ames24740	MS204	2.03919	1.83947	8.60219	8.83001	3.22101	-1.3417	4.54201	3.37952	10.3986
Ames24741	MS206	2.25804	1.05828	5.81958	6.08618	2.13803	1.27855	5.42335	3.57761	8.57047
Ames24742	MS211	2.56759	1.19279	5.50135	5.90197	3.7582	0.527542	3.56335	3.29376	7.85966
Ames24743	MS214	1.80372	0.853506	5.12529	5.22021	2.18276	0.261552	4.23196	3.10361	7.06158
Ames24744	MS215	3.86815	1.58512	8.75048	9.51957	3.5103	0.842007	8.66887	4.49176	13.4235
Ames24745	MS216	2.46388	1.97517	6.48751	6.97706	2.41548	0.628407	5.37966	3.54813	9.17818
Ames24746	MS221	3.28095	1.19839	4.77724	5.63553	3.02403	0.175978	4.93485	3.49818	8.08675
Ames24747	MS222	3.00827	1.19979	4.71635	5.46614	2.84399	0.36629	5.45635	3.62978	8.27189
Ames24748	MS223	4.07451	0.964991	6.4927	7.49612	3.6317	0.432841	5.49214	3.75887	9.97442
Ames24749	MS224	2.85368	1.38769	7.20221	7.64953	2.64186	-0.90509	3.30204	2.79444	8.66866
Ames24750	MS225	2.54393	1.06975	5.46117	5.85916	2.46386	-0.534461	3.68689	2.91611	7.28283
Ames24751	MS226	2.21188	2.43199	8.29862	8.76356	2.11483	-0.120353	5.13574	3.40674	10.3512
Ames24752	MS1334	1.96608	1.05687	5.78879	5.91607	2.39574	1.38658	7.30744	4.11652	9.84733
Ames24989	Va99	2.45976	1.76128	6.19596	6.69244	2.44664	-0.415094	4.95748	3.38644	8.63318
Ames25219	A619Ht1	2.73677	2.97832	10.6848	11.2908	2.12109	1.18499	6.55316	3.89239	13.3004
Ames25220	A619Ht2	2.7199	1.5928	7.93138	8.34018	2.52412	0.434901	5.58298	3.62417	10.3842
Ames25221	A619Ht3	3.33293	1.99273	7.83547	8.56151	3.37783	0.831933	6.13256	3.90766	11.1246
Ames2523	38-11R PARENT HB 19 INB	2.77323	1.30876	7.07904	7.50667	2.73837	-1.08715	3.61783	2.95877	8.75392
Ames25372	Pa91HT1	2.48929	1.51755	6.42498	6.81886	3.16476	-0.690108	4.11128	3.23169	8.49163
Ames25373	Pa91HT2	3.2678	1.53131	6.95907	7.61886	3.22817	-1.1594	3.19025	2.95086	8.77318
Ames25374	Pa91HT3	2.61386	1.51741	6.16639	6.61157	2.84937	0.329941	3.60295	3.04405	8.06896
Ames25559	H60	1.41514	0.703501	4.33145	4.21505	2.03188	0.0169826	2.85515	2.455	5.46079
Ames26021	P8	2.43133	0.803061	2.86524	3.36671	2.63467	-1.19496	4.30842	3.179	6.01712
Ames26022	Tr	2.11918	1.0663	5.98185	6.20149	2.16044	-0.844038	4.09643	3.01817	7.6793
Ames26028	CI 540	4.93053	1.26496	5.87584	7.53811	3.85846	-0.114855	4.38624	3.50839	9.51652
Ames26114	CI 1	NA	1.23488	7.51653	8.27778	NA	-0.324128	5.06736	3.70051	10.4422
Ames26115	CI 2	2.36498	1.69545	7.19996	7.5444	2.87003	0.267692	6.00295	3.77934	10.0711
Ames26116	CI 3A	2.25403	1.362	6.99868	7.24631	2.97061	-0.368385	5.05959	3.51146	9.2806
Ames26118	CI 11B	2.23659	1.42894	8.34497	8.56496	3.51261	0.0244942	7.19867	4.17762	11.7618
Ames26119	CI 19	3.5438	0.843035	3.95203	5.06771	3.36859	0.49008	5.33979	3.69044	8.13199
Ames26120	CI 20	2.45417	1.36001	7.00642	7.30991	1.07032	-1.48803	1.72282	1.46291	7.61406
Ames26121	CI 28	3.05441	1.62937	7.00301	7.58277	2.10849	-1.50325	2.80975	2.43407	8.29981
Ames26122	CI 28B	3.62421	1.62474	7.42216	8.22733	2.18884	-1.66777	2.87636	2.46177	8.89706
Ames26123	CI 28C	3.19183	1.93127	8.61393	9.21508	2.87166	-1.30521	2.90778	2.73947	10.005
Ames26124	CI 30	3.13054	1.63452	8.66252	9.16298	3.26904	2.0901	7.02917	4.19513	12.2882
Ames26125	CI 31	2.61977	1.48599	7.09848	7.5092	2.89383	-0.706314	4.25543	3.23362	9.01854
Ames26126	CI 32	2.97808	2.35364	9.01127	9.59817	2.60275	-0.324354	3.5875	2.92152	10.5022
Ames26127	CI 34	1.83349	1.83808	8.41004	8.6081	3.10057	-0.309126	5.86825	3.75672	10.8337
Ames26128	CI 40H	2.7957	1.41318	8.43947	8.83523	2.31877	-0.400936	4.15416	3.07844	10.0155
Ames26129	CI 41	2.15197	1.37087	7.45562	7.68196	2.06912	0.0878056	4.67843	3.2562	9.19097
Ames26130	CI 46	1.6732	1.18274	5.67628	5.7404	2.2207	-0.514074	6.14814	3.75663	8.67929
Ames26131	CI 70	1.98985	1.2658	6.00608	6.18118	2.36809	-0.416061	5.927	3.68261	8.83091
Ames26133	CI 74	3.45824	1.101	6.49201	7.19586	3.2037	-2.88242	3.10597	2.89747	8.38674
Ames26134	CI 75	2.50635	1.19485	5.90372	6.26887	1.91971	-1.12725	3.00353	2.4161	7.15498
Ames26135	CI 82B	2.48521	1.30716	7.08467	7.37554	2.48943	0.170782	3.457	2.84973	8.49982
Ames26136	CI 84B	1.65186	1.14573	5.17681	5.23748	2.68628	1.5401	7.12188	4.10691	9.39461
Ames26137	CI 91C	3.42972	1.41277	5.96621	6.78893	3.65607	-0.0436774	3.58747	3.32975	8.60223
Ames26138	CI 187-2	1.83436	1.75019	9.60734	9.77417	2.72323	-0.885295	3.96333	3.08286	10.8445
Ames26604	38-11	2.16486	2.36723	10.068	10.4023	1.91106	-0.980971	3.87369	2.82723	11.2229
Ames26741	WX187-2	1.66188	1.47227	9.68068	9.76025	2.28089	-1.73002	3.67963	2.83365	10.6244
Ames26742	WX33-16	1.91225	1.30594	6.97002	7.12437	2.70553	0.659535	7.62132	4.1853	10.8179
Ames26743	WX38-11	2.02596	2.165	9.95546	10.2163	1.85021	-2.60134	2.79416	2.24977	10.7099
Ames26744	WXB14	3.31819	1.77594	8.48336	9.08938	2.98954	0.519012	6.36302	3.89237	11.5285
Ames26745	WXB6	2.09108	1.06238	5.65871	5.84886	1.9209	-2.07694	2.58902	2.26346	6.60694
Ames26746	WXHy	3.76801	1.43735	8.01152	8.79541	3.46347	-0.218154	3.8009	3.24152	10.1618
Ames26747	WXI198	2.21379	2.27386	7.96732	8.42594	2.51667	-0.871395	3.89121	3.00831	9.59101
Ames26748	WXI205	1.45293	1.3037	6.82605	6.88884	2.5945	-0.856095	3.71391	2.94121	8.19485
Ames26749	WXK41	1.91074	0.852044	10.1245	10.1758	1.78424	-1.28023	2.51099	2.11654	10.557
Ames26750	WXK44	4.69169	1.29988	6.44051	7.86809	3.4907	-0.714795	3.11749	3.03472	9.11737
Ames26751	WXK55	2.3629	1.53828	7.16813	7.47933	2.72564	-1.24008	3.72229	2.98474	8.76144
Ames26752	WXK64	2.66611	0.977525	4.70115	5.16042	2.91376	-1.07893	4.85202	3.42426	7.55085
Ames26753	WXL289	2.79385	0.796149	4.18053	4.77319	2.64085	-0.908803	4.57856	3.28191	7.0554
Ames26754	WXL317	3.61406	1.5555	7.17264	7.97491	2.95217	-1.1397	2.20152	2.48951	8.70309
Ames26755	WXM14	1.69365	0.74369	3.93531	3.97528	2.25095	-0.439179	4.05222	3.00394	6.09951
Ames26756	WXOs420	2.75582	1.33462	8.92436	9.25136	2.26162	-1.19659	2.82601	2.4938	9.89777
Ames26757	WXW22	2.56402	1.31888	6.3539	6.72718	3.0757	-0.192264	5.10833	3.54258	8.96047
Ames26758	WXWF9	3.0139	0.894619	5.15606	5.75425	2.82627	-1.50288	2.79425	2.66611	6.95455
Ames26770	66	2.16805	1.67305	9.27415	9.49266	2.29495	0.790587	4.06349	3.09505	10.6179
Ames26771	33-16	1.97274	0.974495	5.20992	5.35428	2.57268	0.0455274	5.03698	3.44762	7.82494
Ames26772	H5	1.43103	2.1291	8.30172	8.48746	2.38692	-0.159369	3.23066	2.76064	9.40658
Ames26773	H10	4.53591	1.0899	5.82993	7.24149	3.18702	-0.971273	3.94485	3.19665	8.76815
Ames26774	H14	3.70712	1.85833	8.34255	9.13818	4.39558	-0.353412	5.23429	3.82634	11.3824
Ames26775	H19	1.97336	1.01335	4.61742	4.85239	2.63485	-0.636952	3.56365	2.93432	6.53733
Ames26776	H22w	NA	1.36262	5.21671	6.32907	3.13003	-0.267788	NA	NA	8.71519
Ames26777	H23w	2.39091	1.05494	6.75307	7.00397	2.94567	-0.360785	4.32247	3.26905	8.70569
Ames26778	H26w	4.85371	0.655662	3.73315	5.89082	3.83417	0.322089	3.80954	3.42981	8.0969
Ames26779	H27w	2.6344	0.783653	1.91156	2.76792	3.48698	0.184252	5.30411	3.68057	6.94364
Ames26780	H28w	2.63739	0.836552	3.83992	4.39024	2.97043	-2.16989	2.39881	2.55847	5.70335
Ames26781	H29w	2.65295	0.897815	4.06815	4.59155	2.99357	-1.49014	2.38978	2.58234	5.91548
Ames26782	H30w	2.38232	2.11739	8.31103	8.70593	2.07845	-1.60592	4.45781	3.13051	9.96358
Ames26783	H41	1.73565	0.950494	4.5125	4.62155	2.33346	-0.279113	3.88699	2.98293	6.40878
Ames26784	H42	1.50801	0.808643	4.47553	4.39963	3.01113	0.388902	4.66918	3.42394	7.07735
Ames26785	H45	1.34894	1.3448	7.7867	7.82681	2.81322	-0.535444	4.88836	3.41342	9.57158
Ames26786	H46	1.53516	1.59541	8.02302	8.12821	2.90979	-0.0685929	4.24261	3.23023	9.57914
Ames26787	H49	1.50751	2.08142	10.401	10.5503	3.25699	1.15632	7.08765	4.14426	13.2274
Ames26788	H50	2.3835	3.82813	10.7302	11.4888	1.6753	0.632092	6.40586	3.78717	13.2676
Ames26789	H51	2.36844	1.52412	5.68044	6.05963	1.9044	0.305342	6.20193	3.72565	8.8658
Ames26791	H55	3.40097	1.7069	6.81248	7.58464	2.68541	-1.6461	1.80656	2.18281	8.18639
Ames26793	H71	2.73068	0.993773	4.73417	5.23142	3.10396	-0.62501	3.32821	2.95318	6.86278
Ames26794	H73	1.72702	0.87965	5.22709	5.27168	2.5436	0.179795	3.57625	2.93136	6.86873
Ames26795	H88	2.48516	1.33254	7.43617	7.74138	2.99779	-0.321954	5.25202	3.56538	9.81
Ames26796	H93	3.50041	0.729595	4.81774	5.64858	2.82221	-1.03567	2.72477	2.63752	6.88023
Ames26797	H96	3.95136	1.4645	6.12359	7.17969	3.45372	-0.248076	2.97272	2.97061	8.48411
Ames26798	H98	2.5178	1.40904	9.09562	9.36538	1.82998	-0.456421	3.83518	2.86391	10.248
Ames26800	H106w	2.77438	0.890581	4.15893	4.70541	2.79014	-0.794342	3.97134	3.09437	6.73963
Ames26801	H108	3.44937	1.36141	6.64144	7.39185	2.72477	-0.653023	3.35714	2.87615	8.543
Ames26802	H109	3.21618	1.40538	6.52164	7.19196	3.0331	0.0987154	3.83663	3.15069	8.7044
Ames26803	H113	1.74233	1.17153	6.16207	6.22754	2.51361	0.33474	2.89866	2.66817	7.3251
Ames26804	H121	2.51254	1.23014	5.31778	5.72403	1.94848	1.22919	3.83803	3.01253	7.33123
Ames26805	H122w	2.49339	1.03925	7.28659	7.55417	2.63934	-0.799793	6.66334	3.90959	10.3998
Ames26806	H124w	3.46234	1.1951	6.78021	7.48755	2.56716	-1.06945	3.72512	2.95537	8.72859
Ames26808	Ill.Hy	3.7163	2.06618	7.86189	8.75814	3.57986	-0.1971	2.69836	2.9185	9.78803
Ames26909	Mo41	2.18224	0.752284	3.07623	3.38202	2.00052	-0.761171	3.82316	2.8593	5.3763
Ames27018	CH711-10	1.5181	1.06046	6.48274	6.46178	3.06614	-0.10934	4.42561	3.34185	8.39089
Ames27019	CH732-12	3.32114	0.829772	5.53688	6.28224	3.08806	-0.523288	3.85261	3.15658	7.98028
Ames27020	CH741-6	3.6611	0.848571	5.97542	6.81917	3.16119	-1.46379	3.23204	2.86997	8.01927
Ames27021	CH753-4	3.36931	0.662146	3.93124	4.91143	3.33715	0.261474	3.38049	3.10296	6.84644
Ames27024	CL17	1.67579	1.59742	6.58091	6.71014	2.26243	-0.985925	3.50374	2.77085	7.88733
Ames27025	CL18	1.8937	1.60831	6.73396	6.91467	2.12058	-0.573238	3.49181	2.74044	8.00667
Ames27026	CL19	3.53672	0.747211	5.05832	5.88269	2.16157	-2.46711	3.16e-05	1.09127	6.21456
Ames27029	CL27	2.69136	0.93714	5.88181	6.24532	3.34271	0.265184	5.95467	3.83064	9.27451
Ames27031	CM99	2.46512	0.412913	2.22744	2.81927	3.25381	0.0356123	6.4458	3.9387	7.71623
Ames27032	CM145	2.06178	1.50998	7.89526	8.11139	3.03791	-0.177771	5.27418	3.58675	10.1365
Ames27034	CM155	3.19942	1.15438	6.77082	7.33822	2.93739	-1.75334	1.95922	2.40322	8.10082
Ames27036	CM182	2.1273	0.9996	5.84285	6.0428	2.45526	-0.133715	4.92703	3.39155	8.16953
Ames27037	CM234	1.97171	0.791923	5.27064	5.3472	3.05722	-0.145235	5.19103	3.56727	8.03719
Ames27038	CMV3	2.4007	1.05184	5.38616	5.67115	3.34447	0.343478	4.8374	3.53402	8.18517
Ames27039	CO117	3.26891	1.30723	6.11388	6.77773	2.43929	-1.71942	2.77862	2.4855	7.64694
Ames27040	CO120	3.64944	1.49126	6.86753	7.69889	3.42896	0.581597	5.39597	3.71664	10.0426
Ames27041	CO150	2.43806	1.02093	6.29266	6.54141	2.52007	-1.41875	3.47531	2.7809	7.69004
Ames27042	CO158	2.90906	1.44919	6.37348	6.89474	3.11265	0.564698	6.0224	3.8328	9.69998
Ames27043	CO192	1.93056	0.821524	6.02401	6.1111	1.97082	-0.237211	5.0982	3.36143	8.18087
Ames27044	CO216	2.58283	1.72445	8.26025	8.64489	2.19204	0.195686	4.81707	3.31746	10.1346
Ames27045	CO220	3.69524	1.82018	8.23074	9.00594	2.15466	0.493078	5.40094	3.50781	10.7485
Ames27046	CO236	2.82015	1.0644	7.41803	7.79421	3.05597	-0.130555	5.75185	3.7085	10.0896
Ames27048	CO245	2.61202	1.96538	7.63964	8.10235	2.30867	-1.06252	3.94181	2.96537	9.25629
Ames27049	CO252	3.18373	1.40167	5.68606	6.39215	2.90104	NA	7.22253	4.18612	10.3494
Ames27050	CO255	2.36669	2.13251	6.14309	6.64178	1.59994	0.211208	4.03197	2.91065	7.9169
Ames27051	CO256	4.6837	0.715371	3.69104	5.73762	2.91433	-1.27255	2.53821	2.61656	6.87319
Ames27052	CO257	1.42951	0.775749	5.13797	5.12022	1.02388	-0.747192	3.99431	2.58146	6.34901
Ames27053	CO258	2.77088	1.12552	6.03496	6.51246	2.14589	-0.486097	3.82252	2.85846	7.77318
Ames27057	CSJ3	2.82035	1.37042	7.57885	7.97663	2.31627	-0.474821	4.06967	3.02738	9.21148
Ames27064	A441-5	4.47663	0.902657	5.64971	7.0123	2.54412	-2.13364	2.10335	2.24874	7.64121
Ames27065	B73Htrhm	2.53866	2.38585	6.72041	7.36282	3.20659	0.591515	6.5992	3.98435	10.4161
Ames27066	B164	2.03841	1.44243	8.11426	8.29724	1.52892	-1.21738	4.15671	2.89182	9.32221
Ames27067	C49A	2.17716	1.09809	6.1593	6.36693	3.0813	-0.305371	4.6012	3.3867	8.42091
Ames27068	CH9	2.0596	1.01099	6.54398	6.76715	2.22449	-1.3398	2.45237	2.25502	7.49878
Ames27069	CH701-30	3.47369	1.90697	7.31435	8.11596	3.33953	-0.36298	5.88842	3.80989	10.5316
Ames27070	CM7	3.31779	1.36314	7.36502	7.96832	3.46844	0.142776	4.61751	3.48924	9.85746
Ames27081	CML 103	3.19773	0.779622	4.33908	5.12859	3.13174	-0.684756	4.25487	3.28924	7.27713
Ames27082	CML 108	2.75818	0.75941	3.72743	4.30578	2.41226	-1.08954	3.45782	2.80476	5.91102
Ames27083	CML 154Q	2.87563	0.849832	4.76453	5.31351	2.31374	-1.03851	3.74343	2.89871	6.82533
Ames27087	CML 220	4.42578	0.966289	5.27183	6.68291	3.30649	-1.66927	2.13325	2.61239	7.67132
Ames27096	CML 322	1.90395	0.905158	4.74308	4.86472	2.08821	-0.959862	3.47928	2.72204	6.23335
Ames27097	CML 323	1.61591	1.71349	7.15083	7.27579	1.88304	1.4021	4.82769	3.36744	9.04509
Ames27098	CML 328	2.73133	1.09092	4.59295	5.11495	2.63069	0.637329	4.17706	3.1985	7.12193
Ames27101	CML 333	2.81151	1.15702	5.50935	6.00928	1.90365	-1.67732	3.13205	2.47091	6.91715
Ames27104	CMV3	2.2843	0.909713	4.472	4.74752	2.84809	0.0991492	4.4664	3.31222	7.11791
Ames27105	CO106	2.65738	0.787201	4.27528	4.75962	2.39864	-0.94882	2.2757	2.25111	5.72151
Ames27106	CO125	2.82502	1.47032	7.72256	8.14447	2.31999	-1.48994	3.06407	2.56442	8.9366
Ames27107	CO255	2.30906	1.84303	6.13578	6.55957	2.02388	0.0876211	4.31957	3.10073	8.10893
Ames27111	EP1	3.34517	1.24142	6.09041	6.81921	2.55454	0.293312	3.34355	2.83689	7.98588
Ames27112	F2834T	3.02172	0.927717	5.44168	6.01063	2.0635	-0.026	6.50129	3.81151	9.06656
Ames27114	H91	3.60883	1.05977	6.00898	6.84809	2.49083	-0.797194	4.40145	3.11636	8.34611
Ames27116	I137TN	1.21199	0.953935	5.82887	5.73858	2.08248	-0.999369	3.66454	2.80611	7.02061
Ames27121	K64	2.52808	0.922754	4.51444	4.91977	2.99876	0.367246	7.72354	4.22865	9.62138
Ames27122	K148	3.27615	0.930827	5.39038	6.11581	3.26584	-1.08279	3.72904	3.13589	7.79375
Ames27123	Ki3	3.34397	2.11909	7.98943	8.73349	2.03561	-0.0733099	4.77142	3.2677	10.1251
Ames27130	Ky21	2.2446	1.25422	5.90983	6.19561	3.09903	-0.522514	5.30808	3.60816	8.68587
Ames27132	L578	2.98853	1.7198	7.42405	7.98415	4.64714	0.603751	4.32229	3.70435	10.2147
Ames27133	M37W	1.76096	0.986506	5.54565	5.61571	2.68952	-2.18308	3.34166	2.83003	6.94398
Ames27135	MEF156-55-2	2.79589	0.950116	7.94885	8.26808	2.32191	-0.590035	5.73164	3.61041	10.268
Ames27136	Mo.G	4.4778	0.88105	4.27399	5.97209	3.53183	-0.421146	4.52386	3.46399	8.23249
Ames27137	N6	1.67249	1.10521	6.32142	6.37487	2.95583	2.83594	9.32297	4.70966	12.3195
Ames27138	N28Ht	3.16555	1.00071	5.22733	5.93917	3.37263	-1.31018	2.9977	2.92617	7.37565
Ames27140	NC260	3.54554	1.27292	6.23543	7.04874	3.06434	-0.498631	3.31581	2.96046	8.33011
Ames27141	NC290A	1.76662	1.23076	6.99079	7.08105	2.53155	0.647254	5.51015	3.60656	9.38004
Ames27142	NC292	3.2071	1.63811	6.39923	7.16186	3.44081	0.539054	5.76745	3.81216	9.87097
Ames27143	NC294	2.94827	1.21597	7.29166	7.73251	3.28958	-0.769047	4.90142	3.55464	9.77406
Ames27144	NC296	4.11476	0.779931	3.44533	5.09827	4.37762	-0.0472254	5.25737	3.82791	8.4644
Ames27146	NC300	3.54508	0.688492	3.40765	4.60379	3.71967	-0.694496	3.77205	3.29561	6.95627
Ames27147	NC302	2.89236	0.77527	3.79601	4.48318	3.5602	-0.0685218	5.37404	3.71636	7.83742
Ames27148	NC304	4.27337	0.843001	4.50681	5.98623	3.69645	-1.60991	2.76034	3.09952	7.63418
Ames27149	NC306	4.14266	1.34441	8.58146	9.4367	2.76521	0.174828	8.38666	4.34131	12.8857
Ames27150	NC308	3.75483	1.33971	7.91548	8.66552	3.12941	-0.568518	6.43618	3.90616	11.1939
Ames27151	NC310	2.70516	1.24445	6.46483	6.87805	3.10694	-1.23149	5.13662	3.5488	9.08902
Ames27152	NC312	3.21005	1.18626	6.981	7.55825	2.77178	-0.803882	6.77301	3.95356	10.4862
Ames27153	NC314	2.5303	0.99349	7.86575	8.11406	2.75777	-0.960381	5.14552	3.48827	9.9703
Ames27154	NC316	3.04112	2.70785	8.51988	9.25218	2.404	0.564259	5.87186	3.65363	11.1616
Ames27156	NC320	4.73859	1.55158	5.99151	7.57626	2.12601	-2.27868	1.50228	1.82751	7.95598
Ames27158	NC324	3.25367	1.25795	8.81937	9.29724	2.78476	-1.29819	4.95427	3.4339	10.8358
Ames27159	NC326	2.53153	1.69878	6.64215	7.07965	3.4542	0.173217	6.45689	3.97247	10.1853
Ames27160	NC328	2.81403	1.97593	6.50435	7.13298	2.71892	-0.136508	4.92046	3.42803	9.04076
Ames27161	NC330	2.861	1.81269	6.6267	7.2273	3.36836	0.301633	5.73085	3.78112	9.84543
Ames27162	NC332	2.54879	2.37135	7.11607	7.69733	1.93091	-2.06673	1.89998	1.77168	8.06359
Ames27163	NC334	2.70889	2.28426	6.95403	7.57965	1.82671	-2.0157	1.97544	1.92391	8.00286
Ames27166	NC340	3.43682	0.705437	1.55893	3.36157	3.73747	-1.31592	3.51729	3.21609	6.02091
Ames27167	NC342	1.54017	1.18989	5.0847	5.10165	2.14547	0.386845	5.75916	3.61872	7.99639
Ames27168	NC344	2.42713	1.04859	4.84836	5.21427	1.98904	-1.03615	2.81981	2.39918	6.1544
Ames27171	NC350	4.63754	1.07382	4.69938	6.435	2.71956	-1.57317	2.388	2.46494	7.27224
Ames27174	NC356	3.43145	0.785748	4.66653	5.52016	3.47523	-0.388459	5.46587	3.71098	8.47862
Ames27175	NC358	3.3211	0.949811	4.37189	5.23765	3.7625	0.701037	4.22783	3.40201	7.58493
Ames27177	NC362	1.99277	1.20778	6.19789	6.35484	2.81293	1.16636	5.29994	3.62367	8.89203
Ames27180	NC368	2.60106	1.0878	6.13933	6.50945	3.1135	-0.982073	5.51622	3.66013	9.04796
Ames27181	NC370	4.23812	1.52236	5.65123	6.99224	2.06458	-1.78057	1.46101	1.53989	7.31795
Ames27182	NC372	2.63275	2.64992	7.79554	8.43782	3.17672	0.88261	6.72322	4.02494	11.3105
Ames27183	Oh43E	1.94968	2.13142	11.2787	11.4998	2.55844	-0.185907	4.92159	3.40067	12.7358
Ames27184	Pa762	3.39036	1.22898	8.99258	9.55368	2.21938	-0.554001	5.35597	3.48402	11.1557
Ames27185	Pa875	2.89138	1.06585	4.59794	5.34942	3.16745	0.0270656	2.98968	2.91144	6.904
Ames27187	R4	1.67993	1.03262	4.54905	4.60185	2.01045	0.477741	3.52618	2.78595	6.14621
Ames27190	T234	2.7675	1.32652	6.72889	7.1698	3.15039	0.506162	4.76483	3.49258	9.16309
Ames27191	U267Y	2.98959	1.41894	7.07337	7.59918	2.79413	-0.634728	3.26571	2.85152	8.65942
Ames27192	Va14	1.16653	1.71149	7.56205	7.61789	4.0517	-1.18903	4.27253	3.50314	9.59226
Ames27193	Va85	3.10322	0.847907	4.28484	5.0227	3.41018	-0.0521324	4.33775	3.38284	7.44041
Ames27194	W401	1.95865	0.925466	5.11003	5.24877	2.87533	0.789054	4.89052	3.47721	7.78758
Ames27196	Yu796_NS	3.17812	2.09902	8.66704	9.30448	3.48428	-0.135586	4.47634	3.44138	10.8672
Ames27450	LH143 (Maintainer)	NA	0.433914	3.39192	5.26578	3.844	-0.46152	2.79552	3.07262	7.07618
Ames27451	A632.75 A1 A2 C1 R1-r B1 Pl1	2.44521	0.508692	1.86885	2.49663	3.54811	-0.993824	3.39924	3.13457	5.41112
Ames28170	A619E	2.1039	2.39558	9.52554	9.84651	2.22956	0.720235	5.89941	3.66384	11.6766
Ames28185	CML 77	2.5715	1.14789	5.3958	5.81942	3.1071	-0.0352279	4.15757	3.26759	7.74463
Ames28290	C49	2.15108	1.15537	6.4089	6.60014	3.06937	-0.390051	4.51696	3.35746	8.54058
Ames28291	Hi27 Goodman-Buckler	3.59599	1.28109	6.49324	7.29163	3.26568	-1.03404	2.71789	2.80338	8.39093
Ames28360	Mo401	4.56864	0.977826	5.7776	7.19847	2.82278	-1.30556	3.41705	2.90046	8.38385
Ames28361	Mo402	1.2625	1.08663	7.25193	7.21606	3.13088	0.870033	4.28765	3.36281	9.00961
Ames28362	Mo403	2.37766	1.97286	8.0397	8.42099	2.13051	-0.960125	4.80733	3.26427	9.85095
Ames28365	CI 91B Goodman-Buckler	1.45947	1.70624	9.87238	9.94766	2.84416	-1.22527	3.39618	2.89194	10.8503
Ames28366	N7A Goodman-Buckler	1.76289	1.17321	6.00551	6.17339	1.84169	-0.711747	4.41871	3.08433	7.78744
Ames28367	CI 7 Goodman-Buckler	2.89767	0.857952	4.49627	5.12792	3.47352	0.187745	3.31966	3.12956	7.01509
Ames28411	NC258A	2.51183	1.01298	4.4995	4.9129	2.77467	-1.18112	2.53429	2.55323	6.07318
Ames28412	NC262A	1.84284	1.09421	6.09196	6.19278	2.6098	0.759199	6.36504	3.86959	9.30925
Ames28413	NC262B	1.67751	1.42337	7.2971	7.39846	2.3205	1.04541	6.37896	3.85158	10.1308
Ames28414	NC266	3.50316	1.08962	6.74096	7.43859	3.36359	-0.7362	6.16358	3.86874	10.1793
Ames28415	NC266B	3.42059	1.26256	7.71548	8.33212	3.37668	-0.749748	6.5927	3.98559	11.0821
Ames28418	NC276	2.46693	1.00475	3.35864	3.87605	3.03001	-0.531272	3.94935	3.17305	6.27156
Ames28419	NC278	1.7799	1.43387	5.94155	6.09139	2.93813	0.0850458	5.28638	3.58444	8.57069
Ames28420	NC278A	1.82007	1.30759	5.86696	6.03493	2.98456	-0.169869	5.48987	3.64405	8.68238
Ames28421	NC280	2.81687	2.64967	8.11	8.79971	3.46686	0.368528	6.30504	3.94951	11.3933
Ames28422	NC282	2.40489	1.97048	6.29175	6.77552	2.87256	-0.304315	5.04361	3.48303	8.9
Ames28423	NC284	2.08465	2.13353	6.05541	6.51238	2.99932	0.113906	5.50768	3.66618	9.07388
Ames28424	NC286	3.14019	1.26482	6.00308	6.64334	2.03908	-1.34131	3.39334	2.67342	7.63289
Ames28425	NC288	1.71764	1.35911	7.33177	7.40867	2.66307	0.495048	5.08561	3.48408	9.37747
Ames28426	NC290	1.73355	1.2647	7.37587	7.46912	2.28868	1.15887	5.79285	3.68791	9.8121
Ames28927	Mo27W	1.6676	0.932958	4.58009	4.6088	2.65199	-0.844974	3.19772	2.7607	6.104
Ames28928	Mo28W	2.44608	0.965036	5.41584	5.76663	2.83812	-0.0539718	3.78239	3.08667	7.4221
Ames28929	Mo29W	2.71918	1.08159	5.95731	6.38716	3.17228	-1.01529	3.90559	3.18958	8.05348
Ames28930	Mo30W	2.96171	1.12284	6.39757	6.91586	3.32242	-1.47723	3.30411	3.03142	8.27134
Ames28931	Mo31W	2.75069	1.12804	7.39604	7.74651	2.71396	-1.51656	3.29258	2.77217	8.71334
Ames28932	Mo32W	1.81426	1.21785	4.89305	5.01876	2.08069	0.271427	6.08434	3.70587	8.13608
Ames28933	Mo33W	2.19878	1.29261	6.42783	6.6743	2.87082	-0.263599	4.67727	3.39036	8.6072
Ames28934	Mo36	1.84379	2.04182	8.25705	8.49222	2.9118	-1.13015	4.0802	3.17723	9.80416
Ames28935	Mo37	1.82673	0.767615	3.52925	3.61967	2.61841	-1.62995	4.1307	3.11409	5.9461
Ames28936	Mo38	3.29447	0.739031	2.00673	3.49398	3.65203	-0.708907	3.25006	3.12978	5.92059
Ames28937	Mo39	1.59484	1.60737	7.6844	7.80321	2.72436	-1.18703	4.20325	3.16541	9.22584
Ames28938	Mo43	2.97152	0.910751	4.79636	5.46213	2.57348	-1.2414	2.93191	2.63404	6.64758
Ames28939	Mo44	3.90067	1.85505	8.09649	8.98252	3.63318	-0.954955	4.57851	3.49794	10.6725
Ames28940	Mo501W	2.82098	1.52174	8.2473	8.64905	2.59694	-0.318289	4.71691	3.32395	10.1656
Ames28941	Mo502W	2.08553	0.834467	4.33294	4.52242	2.31534	-0.204165	5.99346	3.69831	7.8569
Ames28942	Mo506W	3.35453	1.09799	5.34615	6.15029	4.15826	0.837434	4.22366	3.58152	8.61381
Ames28943	Mo508W	2.20462	1.43809	7.30306	7.55011	2.26123	-0.847966	4.52518	3.19472	9.02523
Ames28944	Mo510W	2.35991	1.7083	7.24769	7.64863	1.97485	-1.07927	3.67486	2.77615	8.66149
Ames28945	Mo511W	2.81786	1.17144	6.48316	6.91384	2.67129	-0.454257	4.85157	3.38791	8.79172
Ames28946	Mo512AW	1.56964	1.57338	8.56805	8.65379	2.78055	1.28343	7.18569	4.11167	11.7065
Ames28947	Mo512BW	1.39584	1.71905	8.80163	8.93021	2.81259	1.36185	6.80404	4.03287	11.6844
Ames28948	CI 4A	1.67477	1.21074	7.27766	7.35837	2.59458	0.61625	4.35198	3.24346	8.97504
Ames28949	CI 12	2.63078	1.03651	6.10465	6.50023	2.81742	0.894024	4.79942	3.45498	8.61089
Ames28951	CI 42B	2.6284	2.37028	7.25236	7.84749	2.98616	0.771279	4.38832	3.34632	9.53755
Ames28952	CI 43	1.83737	0.987341	4.45297	4.60356	2.17242	-0.683195	3.77796	2.88818	6.2535
Ames28953	CI 92	2.91362	1.07229	4.62428	5.27981	3.30564	-0.0612506	3.86767	3.2263	7.33727
Ames29394	1497-2	2.34338	1.05702	8.56466	8.76977	2.76596	0.975474	5.58694	3.69125	10.8071
Ames29451	GE 440	2.87907	1.00635	4.61158	5.20706	3.0486	-0.699389	3.00035	2.84896	6.64389
Ames30531	MR14 (Longfellow Flint)	1.9316	1.4523	6.59564	6.76116	2.58174	-0.946263	3.14912	2.72706	7.8384
Ames30533	MR19 (Santo Domingo)	1.74568	1.35839	7.75866	7.86548	2.65234	-0.692604	4.4447	3.25442	9.33152
Ames30855	CML 325	2.05162	1.50338	5.62639	5.89936	2.10437	1.24573	5.29617	3.53919	8.33879
Ames30856	CML 336	2.89808	1.04218	5.7953	6.31098	2.29814	-1.48938	3.39932	2.74597	7.42725
Ames30857	CML 337	2.55517	1.33337	6.4888	6.84118	3.45618	0.344455	6.24797	3.9238	9.87792
Ames30862	NC44	2.60224	1.5561	9.18548	9.49063	2.9474	0.0102276	5.99023	3.76638	11.5786
Ames30864	NC89	5.19698	1.73699	6.69382	8.44424	3.95263	NA	6.55501	4.17187	11.6943
Ames8399	W117HT	3.50265	1.14064	7.40115	8.05922	2.34005	0.138897	4.38385	3.18083	9.45225
CIze127	CI 127	3.47346	0.993373	4.80634	5.71614	2.96613	-1.74957	2.14352	2.48317	6.67988
CIze21	CI 21E	3.85602	1.41302	6.49859	7.45532	3.30994	-1.32791	2.69679	2.86724	8.55261
CIze23	CI 23	3.09157	1.27309	6.53201	7.11293	3.56552	-0.0712656	4.73159	3.53714	9.23578
CIze27	CI 27	4.02961	1.3774	8.19221	9.04605	3.57585	1.61663	7.88341	4.37892	12.7276
CIze28	CI 28A	2.73639	1.46912	6.06144	6.55062	2.23829	-1.24656	3.22423	2.62396	7.54002
CIze29	CI 29B	1.48677	1.3594	8.12831	8.14872	2.73952	0.0103239	3.75939	3.04247	9.40104
CIze317	CI 317B	3.95768	1.39202	6.1339	7.20101	3.65167	-1.05328	3.0449	3.06151	8.55307
CIze38	CI 38B	2.18837	1.57979	7.84962	8.08617	2.14505	1.34024	5.71387	3.65904	10.2418
CIze40	CI 40A	2.85587	1.19272	7.88099	8.27783	2.32461	-0.612352	3.77172	2.90573	9.34009
CIze42	CI 42A	3.13859	2.82491	7.9828	8.88421	3.19893	0.762399	4.76487	3.50891	10.624
CIze45	CI45	2.77174	0.870612	4.3798	4.9356	3.94117	0.682415	4.62908	3.61427	7.87111
CIze49	CI 49A	1.90193	1.22601	4.76717	4.95077	2.19836	-0.0975701	5.07735	3.39911	7.41004
CIze64	CI 64	2.43184	0.84503	3.67134	4.09932	3.16288	-0.162595	4.7754	3.47055	6.99789
CIze81	CI 81B	3.94259	0.890718	5.25069	6.36717	3.52688	0.441705	4.65891	3.52736	8.66996
CIze82	CI 82A	2.61753	0.961674	6.0749	6.42732	2.54756	-0.217111	4.73483	3.32166	8.33409
CIze83	CI 83A	3.42376	1.1575	7.02226	7.68093	2.90465	-0.365954	2.42715	2.60149	8.52081
CIze85	CI 85B	2.52028	1.21179	6.72243	7.02385	2.07419	0.286347	5.62801	3.57898	9.23329
CIze86	CI 86B	2.38158	1.18669	7.03741	7.28139	1.82398	-3.05312	2.01173	1.72708	7.66322
CIze89	CI 89B	1.78678	1.39878	5.67541	5.82065	2.29793	0.0338489	5.0336	3.39577	7.97794
CIze90	CI90A	2.91268	1.52311	6.58115	7.11595	3.24495	0.186073	4.66177	3.46195	9.07647
CIze91	CI 91B	2.46058	1.72727	6.96221	7.35425	3.20869	0.651207	5.25462	3.64577	9.60381
NSL117226	R802A	3.41919	1.50564	9.32132	9.89308	2.57918	0.627929	5.05512	3.48071	11.4538
NSL174429	INB 101LFY/LFY (A632 X M16 S5)	4.02445	1.0342	5.71051	6.7974	2.90167	-1.5567	2.89719	2.7302	7.89629
NSL197104	H116	2.00391	0.994828	6.19186	6.34773	2.71564	0.14021	4.07028	3.15105	8.01244
NSL197105	H117	2.46702	1.66967	6.23041	6.62312	2.89027	-1.88666	2.12781	2.43187	7.47178
NSL197106	H118w	3.79136	1.79128	7.69578	8.57127	3.39983	0.866314	5.16679	3.66232	10.6067
NSL22628	K47	1.90348	1.1794	6.169	6.25273	2.69684	-2.03064	2.93554	2.6582	7.34152
NSL22629	Oh7B	1.67386	2.12714	7.71786	7.95388	2.41141	-0.136053	5.91059	3.67613	10.1661
NSL22630	K150	1.4572	1.47262	7.86231	7.90723	2.2117	0.562689	6.14308	3.7525	10.2521
NSL22631	K11	3.95206	1.58652	6.78653	7.79847	2.28717	-1.72006	1.87425	1.80641	8.20136
NSL22632	K201	2.93624	1.12038	6.67987	7.15124	3.22754	-0.773409	2.77205	2.82208	8.25218
NSL22633	KYS	1.43513	1.48724	7.44895	7.48049	2.42192	-0.627754	4.6406	3.25839	9.03981
NSL22634	K155	1.96629	1.2364	4.70007	4.90691	2.07175	0.390755	6.36631	3.79197	8.28194
NSL22635	K41	4.048	0.829627	4.03992	5.47815	4.08172	0.214208	5.11663	3.74824	8.56179
NSL22983	C102	3.14767	1.07587	6.67098	7.19337	2.49541	1.24037	6.87199	4.00066	10.3254
NSL22984	J47	4.27159	0.763605	3.25167	5.07416	3.58675	-0.915511	4.13268	3.33532	7.42646
NSL242483	R105	2.47171	0.674241	2.94784	3.37901	2.62804	-0.942641	2.93614	2.65848	5.0721
NSL243016	792	3.31959	1.02598	5.16176	5.94196	3.47689	-0.857234	3.7692	3.22668	7.8295
NSL250299	MP307	2.07801	0.881866	5.50654	5.65035	3.19223	-0.720001	5.40544	3.64616	8.4012
NSL28965	Oh33	4.12115	1.46585	7.1536	8.22721	3.2683	0.287101	4.54611	3.43666	9.95656
NSL28966	Oh40B	2.92554	1.46117	6.63917	7.19846	2.91079	-0.420705	4.25589	3.24298	8.84142
NSL28967	Oh56A	1.87603	1.61205	9.15421	9.31852	2.32559	-1.32486	3.45368	2.77368	10.184
NSL28968	Oh84	1.63706	0.918619	3.67276	3.66393	2.62596	0.484233	4.5612	3.31391	6.40298
NSL29282	R901	0.952783	1.17863	7.57454	7.47795	2.46726	0.466747	4.25584	3.17559	8.98556
NSL29284	R902A	2.90624	1.99249	7.02756	7.68272	2.93725	-0.625803	2.11738	2.48381	8.44663
NSL29285	R903B	2.59209	0.894172	4.24736	4.6932	2.1304	-1.15559	3.11208	2.59877	5.93454
NSL29287	R941	NA	1.47636	6.76402	7.36623	2.66933	0.0437349	3.51412	2.84515	8.4563
NSL29303	R216	1.38601	0.833888	4.82797	4.70369	2.93289	0.640136	4.56527	3.39341	7.2507
NSL29304	R216A	1.5142	0.80967	4.23395	4.15439	3.08506	0.889816	5.87311	NA	7.85801
NSL29305	R218	3.10159	0.982551	6.66897	7.19994	2.21098	-0.322235	5.09828	3.39685	9.06657
NSL29314	R219	3.50771	1.18734	7.6876	8.32851	2.9559	-0.838341	4.63379	3.36932	9.95787
NSL29316	R220	3.88055	1.18774	6.67993	7.60011	3.32389	-1.72339	2.33416	2.81973	8.63555
NSL29319	R222	1.60855	1.20887	6.95211	7.00051	2.11852	-0.739303	2.41468	2.21769	7.62081
NSL29898	R222A	1.30775	1.55717	8.77041	8.82294	1.78911	-2.22721	3.09979	2.41942	9.47486
NSL30046	B41	1.27936	1.01403	6.11052	6.06626	2.61249	0.734168	4.05299	3.17535	7.78539
NSL30053	W22	2.54843	0.887168	4.32843	4.80253	2.57528	-0.604545	3.34273	2.79419	6.35937
NSL30055	W374R2	1.63074	0.666079	4.44554	4.41711	2.83784	-0.492424	3.64379	3.00719	6.36159
NSL30056	W703	1.94256	1.49076	6.86593	7.0264	2.28582	0.0291475	3.08536	2.65212	8.00096
NSL30058	W64A	1.51471	1.48444	8.05968	8.10145	2.01182	-2.55402	2.65971	2.26509	8.70025
NSL30059	W153R	3.27564	0.695533	5.07035	5.79069	2.91692	-1.51147	3.06158	2.78194	7.06967
NSL30060	W23	1.32733	0.800585	4.12901	4.04879	2.32347	0.15573	4.81338	3.34907	6.72435
NSL30062	W182B	1.84122	1.39831	6.57924	6.7237	1.95322	0.338317	5.87523	3.63904	9.13876
NSL30063	W182D	1.62815	0.960314	4.94843	4.9762	2.38886	-0.263327	4.13827	3.08182	6.85088
NSL30064	W24	1.55966	1.64473	7.62944	7.78673	1.80492	-0.366929	4.11445	2.95315	8.94486
NSL30065	W9	2.68188	0.848571	6.35569	6.72001	2.25162	-0.481378	5.38082	3.50164	8.87385
NSL30066	WR3	3.60541	0.871322	6.78115	7.46751	2.06197	-2.38888	1.89318	1.83377	7.89762
NSL30067	W22R	2.95483	1.22131	5.24567	5.85957	2.84474	-1.07911	3.05363	2.79472	7.10853
NSL30068	W374B	3.24685	0.637956	2.50214	3.70735	2.93843	-0.740302	3.0674	2.80913	5.50514
NSL30070	WM13R	3.13431	1.16864	6.66746	7.25877	3.11291	-1.80976	3.49967	3.01106	8.58117
NSL30071	W32	2.55728	0.876231	3.97304	4.52375	3.03705	0.130196	4.90608	3.49359	7.32419
NSL30073	W37A	2.64891	0.921777	5.30748	5.70416	3.58365	-1.54311	3.55809	3.1711	7.55336
NSL30074	W182E	1.93949	1.74225	6.26414	6.53757	2.72065	-0.507137	4.53402	3.29132	8.3808
NSL30835	SD10	2.0463	1.94377	9.17893	9.4336	2.37797	-1.06351	4.16538	3.0842	10.5579
NSL30861	A	1.71075	1.15115	5.71549	5.78802	2.23972	-0.531433	3.65532	2.85323	7.13085
NSL30862	K	4.34939	2.11722	9.28449	10.3163	3.28488	0.372601	6.8652	4.05228	12.8188
NSL30863	L	1.80501	1.04866	4.60719	4.77054	2.21447	0.260855	3.92101	2.99832	6.60109
NSL30864	HY2	2.79895	1.7898	6.57766	7.19956	2.85697	-0.183567	2.73365	2.70375	8.1653
NSL30865	R2	2.17612	0.954061	4.10331	4.3456	2.39683	0.315187	3.68287	2.94874	6.2136
NSL30866	R004	1.23195	1.5474	4.42095	4.47967	1.14749	0.232976	3.33822	2.49805	5.71165
NSL30867	M14	1.25923	0.735751	3.47406	3.24445	2.80503	-0.286222	3.9807	3.10357	5.79176
NSL30868	R30	4.6824	1.44505	6.97227	8.33465	NA	-0.552276	3.3941	3.56588	10.2414
NSL30869	R53	2.59794	2.02558	9.85596	10.2001	2.25669	0.769284	5.58422	3.60442	11.8682
NSL30871	R061	0.71867	1.67617	7.52136	7.49638	0.940901	-1.0497	4.04032	2.83641	8.55844
NSL30872	R71	2.94713	0.924396	4.41825	5.10493	2.8938	1.15084	5.05838	3.56497	7.89959
NSL30873	R74	4.67253	0.729998	3.01811	5.3337	3.0109	-1.25776	3.31257	2.91943	6.88484
NSL30874	R75	2.37968	2.6512	NA	NA	2.61706	-0.548115	3.7844	3.00329	14.3304
NSL30875	R76	1.97771	3.18317	12.5658	12.9785	2.29025	-0.121938	4.91454	3.35247	14.0385
NSL30876	R78	NA	2.2857	10.204	11.6204	2.70669	0.312358	5.28712	3.5564	13.0584
NSL30877	R84	2.1227	NA	12.6583	13.2228	2.5903	-0.0516515	4.89862	3.39347	14.3226
NSL30878	R101	1.52445	0.82298	3.82746	3.79923	2.13243	-0.99163	4.24214	3.07299	6.02532
NSL30879	R103	1.16707	1.03154	5.6939	5.5648	2.15161	0.245307	4.2638	3.1036	7.34846
NSL30880	R105	2.65005	0.724783	3.76243	4.28226	2.60832	-1.42699	2.5574	2.49145	5.52683
NSL30883	R113	2.63188	1.04967	4.507	5.01996	2.96653	0.250717	3.30667	2.95515	6.73153
NSL30884	R134	2.31192	1.08101	5.84843	6.10296	2.82886	-0.322843	4.59654	3.33967	8.13526
NSL30885	R138	2.90524	2.5381	7.24896	7.99241	3.18176	0.772333	3.24181	2.98351	9.16735
NSL30888	R154	2.45802	1.57168	6.47235	6.87591	2.90095	0.225679	4.12106	3.17655	8.47261
NSL30890	R159	3.85137	1.42147	6.93988	7.83545	3.10144	NA	5.11896	3.6674	10.052
NSL30891	R168	3.28263	1.18875	5.55654	6.27083	2.92965	-0.803478	3.33878	2.91775	7.65246
NSL30894	R177	0.893017	1.59499	8.40912	8.40126	2.72058	-0.333798	4.12372	3.13625	9.72907
NSL30895	R181	1.72648	1.97286	8.95275	9.15249	2.00322	-0.644638	4.47394	3.13548	10.3409
NSL30896	R181B	1.26339	2.14234	9.58805	9.72575	1.10245	-1.06972	3.76575	2.74151	10.5288
NSL30898	R192	1.68441	0.898107	4.45907	4.57712	1.98239	-0.367872	4.56783	3.17127	6.75969
NSL30901	R196	3.08733	2.01641	9.17186	9.70076	3.19094	-1.91426	2.1245	2.493	10.2915
NSL30902	R197	2.65647	1.72679	8.16577	8.55134	3.11263	-1.8965	2.40712	2.62579	9.36395
NSL30903	90	1.43066	1.07805	5.3989	5.37539	2.34575	-0.59701	2.43625	2.30831	6.2773
NSL30904	4226	2.79181	1.22569	7.5248	7.94267	2.88393	-0.259376	5.03549	3.49406	9.84566
NSL30905	5120B	2.05708	0.807906	5.22117	5.37645	2.45646	-1.71537	2.56595	2.43794	6.37938
NSL30906	R904A	3.36204	2.22668	8.13125	8.88063	3.35158	-0.614212	4.43344	3.38954	10.4273
NSL30907	R906	1.51039	1.54965	6.56849	6.6568	2.40952	0.922503	5.70953	3.67228	9.18924
NSL30908	R907	1.08778	1.04284	5.10002	4.96693	2.17709	-0.287234	4.0036	2.98745	6.71276
NSL30909	R909	0.890555	1.95796	9.81991	9.88257	3.28495	0.22386	4.56433	3.38133	11.2588
NSL30910	R914	1.45624	0.84819	4.6436	4.5821	2.23007	-0.193877	3.93897	2.96643	6.41104
NSL30911	R917A	3.71276	1.9312	7.81789	8.68317	3.73338	0.190071	3.4268	3.24425	10.07
NSL30912	R921E	1.16609	1.09829	6.19424	6.11989	3.07077	-0.73454	4.79764	3.4387	8.31816
NSL30913	R924	3.30717	0.914728	5.02864	5.79596	3.2216	-0.7092	4.56166	3.38396	7.9876
NSL32720	ND33	2.27292	1.2924	7.50645	7.71301	1.96675	-0.16086	2.9037	2.43248	8.46847
NSL32722	ND255	2.27396	0.65522	4.51835	4.81576	2.44682	-0.55472	3.72068	2.92934	6.51961
NSL32723	ND1	1.7102	2.08051	7.77704	7.99171	2.17379	-0.0893944	4.62653	3.23087	9.49415
NSL32725	ND211	3.31019	1.83719	6.91036	7.66713	3.0748	0.603362	3.51782	3.06901	8.99078
NSL32726	ND167	2.79345	0.95571	6.944	7.29293	3.73335	-0.266409	5.99477	3.88978	10.1525
NSL32727	ND-B8	2.04858	0.953408	6.56077	6.72166	2.74492	-0.39405	5.28869	3.54678	8.9687
NSL32728	ND230	2.27528	1.67984	7.84926	8.1427	2.40487	-0.218321	4.44471	3.20361	9.58368
NSL32730	ND405	3.15022	1.2	6.89738	7.45078	2.60711	-1.06677	2.87173	2.6163	8.34892
NSL32731	ND385	1.66163	1.21889	4.57062	4.62908	2.0123	1.75129	6.15249	3.83018	8.22435
NSL32732	ND203	2.10776	1.27098	5.81846	6.06091	2.55536	0.0544831	2.50508	2.49033	7.0234
NSL32733	ND376	3.21048	0.647193	2.20714	3.4172	3.44881	0.544905	2.612	2.92325	5.50888
NSL32734	ND408	3.60077	1.46806	7.78442	8.48145	2.40026	-0.856658	3.51466	2.82036	9.44217
NSL32736	ND480	2.74349	1.32858	7.17991	7.62386	2.09848	-0.714049	3.7858	2.86597	8.7033
NSL32738	ND283	3.07671	1.23809	6.25602	6.8447	2.36108	-0.34643	3.42964	2.79998	7.9809
NSL32739	ND474	1.79853	0.898982	6.70349	6.77108	2.24229	-0.657167	3.04636	2.5755	7.71025
NSL34374	SD15	1.68179	NA	NA	NA	2.00654	-0.482259	4.27266	3.06312	NA
NSL42804	R223	3.05761	1.05754	6.61762	7.13584	2.38888	-1.55873	2.47802	2.38647	7.84733
NSL42872	A7	2.88885	0.90276	4.9516	5.47447	2.75692	-0.64077	2.23804	2.44605	6.4592
NSL42873	A12	3.32771	1.18658	6.38533	7.06365	3.24029	-0.878981	5.65806	3.71675	9.55886
NSL42874	C 14	3.55403	1.26792	5.64595	6.52788	3.32579	-0.944205	2.55454	2.79864	7.69682
NSL42875	A71	1.41444	0.698153	3.45078	3.32442	1.66893	0.0100955	4.65542	3.17274	5.92328
NSL42877	A165	1.97575	1.24837	7.11741	7.27337	2.44153	0.109073	7.06958	4.01476	10.4203
NSL42878	A171	3.14323	1.36622	6.48468	7.10438	3.04872	-1.2496	3.07455	2.82852	8.24969
NSL43597	Tx441	3.53676	1.03335	6.08644	6.87045	3.67175	0.432094	5.54354	3.78735	9.56697
NSL437871	AusTRCF 305795	1.21629	1.89622	8.84098	8.91961	2.7541	0.0600868	6.60714	3.92363	11.4187
NSL437877	AusTRCF 305801	2.73631	0.551349	2.18169	2.97758	2.50217	-3.35506	1.96244	2.13151	4.25788
NSL437878	AusTRCF 305802	2.7718	0.625083	2.76209	3.50752	2.56739	-2.12637	2.20526	2.28415	4.80478
NSL437879	AusTRCF 305803	2.71315	0.946778	5.69945	6.12523	3.07841	-0.746587	2.26142	2.6026	7.17849
NSL437890	AusTRCF 305816	2.98423	0.863411	4.66575	5.29513	3.53635	-1.43733	3.78538	3.23968	7.30566
NSL437891	AusTRCF 305817	2.2989	0.717398	2.99787	3.42318	2.36932	-3.03946	1.94285	2.06707	4.38304
NSL437893	AusTRCF 305819	1.88375	1.36845	7.66213	7.79365	2.71115	-0.392518	5.2327	3.52789	9.73607
NSL437895	AusTRCF 305821	2.73657	1.41564	5.5531	6.08841	2.48037	0.300314	2.90558	2.66265	7.17046
NSL437896	AusTRCF 305822	2.77683	1.3244	6.63309	7.06521	2.8364	0.491874	5.26939	3.57267	9.25818
NSL437897	AusTRCF 305823	3.09465	1.65874	7.51734	8.08719	3.22953	0.0628193	5.06597	3.56446	10.0255
NSL437903	AusTRCF 305829	1.91019	1.07299	5.56211	5.70903	2.18506	-1.4017	3.53251	2.77469	7.0208
NSL437905	AusTRCF 305831	2.36391	1.36171	7.00839	7.29346	3.41933	-1.24515	3.42375	3.09066	8.68694
NSL437907	AusTRCF 305833	3.15421	2.0819	6.55401	7.33855	NA	0.832479	5.64508	3.95042	10.2917
NSL437908	AusTRCF 305834	1.6981	1.20419	6.04023	6.13461	2.2621	-0.867918	3.18408	2.65245	7.20768
NSL437909	AusTRCF 305835	1.76615	1.66305	7.59282	7.76135	2.6852	-0.546855	4.58181	3.26202	9.30576
NSL437910	AusTRCF 305836	1.74265	2.0628	8.14114	8.3773	1.84025	-0.313864	5.11503	3.36162	9.97227
NSL437913	AusTRCF 305839	3.14202	3.06204	8.51392	9.39036	3.67684	-0.149363	5.0927	3.65092	11.286
NSL437914	AusTRCF 305840	2.83187	2.89202	8.24616	8.99374	3.38759	0.0133571	5.09235	3.60802	10.8755
NSL437915	AusTRCF 305841	3.1343	1.03953	4.69208	5.4351	2.22065	-1.43095	2.16737	2.12115	6.15769
NSL437920	AusTRCF 305846	3.7651	1.27064	6.44395	7.32718	2.77157	-1.01221	3.82546	3.03488	8.68429
NSL437923	AusTRCF 305849	3.17015	1.38518	7.09126	7.69558	2.4904	-0.822184	4.09402	3.08636	9.04805
NSL437925	AusTRCF 306065	2.94365	1.18305	5.79071	6.33953	2.48475	-0.69698	3.08648	2.66203	7.44663
NSL437928	AusTRCF 306068	1.62266	1.05746	5.88332	5.91105	1.52373	-0.0257917	3.89567	2.90179	7.25452
NSL437929	AusTRCF 306234	3.2713	0.990011	5.85645	6.51895	2.97818	-0.188695	5.18099	3.55119	8.80438
NSL437930	AusTRCF 306235	2.80472	1.47675	6.59427	7.07419	3.09506	0.215468	5.90689	3.78467	9.72855
NSL437931	AusTRCF 306236	3.5194	1.34194	7.17437	7.86346	2.62592	-0.183028	3.96375	3.0632	9.20129
NSL437933	AusTRCF 306238	2.62032	1.11678	4.78435	5.25792	2.56206	-0.227935	5.73868	3.65031	8.16589
NSL437934	AusTRCF 306239	2.11798	2.11149	8.8269	9.12444	3.00775	0.301996	5.7084	3.72199	11.1812
NSL437935	AusTRCF 306240	3.37424	0.958608	5.44179	6.19265	2.81266	-1.01457	4.59192	3.31342	8.15006
NSL437936	AusTRCF 306241	2.7265	1.28056	6.07725	6.52463	2.89217	0.127982	4.55256	3.35058	8.44506
NSL437937	AusTRCF 306242	2.50688	1.57345	6.93564	7.31601	3.21068	-0.159907	3.40004	3.05078	8.62612
NSL437939	AusTRCF 306244	2.5284	2.40833	6.64193	7.2593	3.11703	0.310423	5.84671	3.7756	9.81963
NSL437940	AusTRCF 306245	2.65257	1.62848	7.80162	8.2021	3.35786	-0.0948548	4.27104	3.36023	9.80915
NSL437946	AusTRCF 306257	2.63016	1.2789	4.61073	5.10581	3.44626	-0.188144	3.45106	3.12104	6.96925
NSL437947	AusTRCF 306258	2.7967	0.961567	4.92836	5.4462	3.04964	-1.38932	3.64382	3.04229	7.12428
NSL437952	AusTRCF 306264	1.83111	1.19317	6.33889	6.44218	3.88318	1.35294	8.61804	4.5148	11.543
NSL437956	AusTRCF 306269	3.11654	0.978525	4.57505	5.30044	3.05482	-0.520992	4.43157	3.31564	7.50928
NSL437959	AusTRCF 306273	2.97389	1.44436	7.13711	7.6599	2.26842	-0.129994	3.36108	2.78914	8.66691
NSL437960	AusTRCF 306274	3.58381	1.08977	6.66988	7.41681	2.09092	-1.49611	2.57759	2.2677	8.03814
NSL437962	AusTRCF 306276	3.05646	1.32111	6.25389	6.8504	2.64787	-3.1602	2.63127	2.50714	7.69332
NSL437964	AusTRCF 306278	2.27417	1.44219	6.6053	6.84937	2.24405	-1.54101	4.31579	3.09513	8.32993
NSL437966	AusTRCF 306280	2.85282	1.28962	5.4127	5.99047	3.10372	-0.649611	3.18715	2.94413	7.38689
NSL437968	AusTRCF 306282	2.81151	1.05822	5.27848	5.83084	2.28861	-1.04255	3.50682	2.79237	7.13509
NSL437971	AusTRCF 306285	4.36996	1.24159	7.17042	8.28171	2.80526	-0.839578	2.66999	2.67472	9.13122
NSL437973	AusTRCF 306287	3.55451	1.07807	4.82595	5.79938	2.79176	-0.999716	2.86098	2.67291	6.96916
NSL437976	AusTRCF 306290	3.96915	1.45577	6.33778	7.39845	3.0079	-0.761678	2.33452	2.61838	8.29052
NSL437979	AusTRCF 306293	1.43895	1.09342	6.41793	6.39522	2.01996	-3.25512	2.36805	2.08101	7.02377
NSL437980	AusTRCF 306294	1.36268	0.925426	5.76101	5.67195	1.40355	-1.54807	1.93124	1.41398	6.02728
NSL437981	AusTRCF 306295	3.73719	1.44615	6.64869	7.52735	2.15182	-1.19723	1.93783	2.05633	8.03068
NSL437982	AusTRCF 306296	0.973762	1.37731	5.93096	5.8584	1.68236	-1.69887	1.61195	1.35551	6.19085
NSL437983	AusTRCF 306297	1.91319	1.36867	6.3698	6.55401	2.21469	-1.14542	2.30884	2.20827	7.1837
NSL437987	AusTRCF 306301	3.1399	1.83227	6.57315	7.29135	2.3509	-0.847472	2.614	2.423	8.06298
NSL437988	AusTRCF 306302	3.18573	1.74733	6.26551	6.98947	3.48794	-0.150427	4.25626	3.38623	8.88907
NSL437989	AusTRCF 306303	3.35712	1.63676	6.20373	7.0027	3.54958	-0.37901	4.02594	3.3136	8.82331
NSL437990	AusTRCF 306304	2.94265	1.79016	6.29019	6.93467	3.16475	-0.182051	4.12992	3.26093	8.66602
NSL437992	AusTRCF 306306	2.75635	2.81592	6.89753	7.74142	3.61691	0.21746	5.32762	3.71286	10.066
NSL437993	AusTRCF 306307	2.53296	2.83403	6.67956	7.45441	3.73825	0.848441	6.65503	4.07519	10.7332
NSL437994	AusTRCF 306308	2.87456	2.14601	6.82719	7.4862	3.83924	0.494728	6.45468	4.0235	10.61
NSL437995	AusTRCF 306309	2.52653	2.3818	6.25443	6.94916	3.48287	0.619739	6.08045	3.89526	9.88752
NSL437996	AusTRCF 306310	2.75659	2.59369	7.31723	8.02933	3.44634	0.200447	5.63749	3.75822	10.4246
NSL437998	AusTRCF 306312	3.03908	1.9826	6.89051	7.56984	2.67372	0.64541	3.20958	2.86894	8.71304
NSL438002	AusTRCF 306316	2.74565	2.04759	6.82299	7.41253	3.20275	1.73666	5.48566	3.78974	9.96348
NSL438005	AusTRCF 306319	2.47663	0.861311	3.188	3.67378	2.49915	-0.330041	2.40315	2.45758	4.96988
NSL438007	AusTRCF 306321	2.86345	1.95824	7.78275	8.32769	2.96296	0.722161	4.20921	3.29599	9.81846
NSL438008	AusTRCF 306322	3.04478	1.17073	6.88004	7.39517	2.71153	-1.83036	2.18102	2.34171	8.06565
NSL438009	AusTRCF 306323	3.65055	1.89986	7.61407	8.44536	2.25562	-0.601098	1.91372	2.01327	8.91195
NSL438010	AusTRCF 306324	3.31208	1.91578	7.69719	8.38378	2.42283	0.257901	2.61754	2.48891	9.10649
NSL438019	AusTRCF 306333	1.67504	1.60277	7.32794	7.44898	2.30778	-1.38241	4.77736	3.28547	9.09482
NSL438021	AusTRCF 306335	2.75959	1.22811	7.17434	7.54806	2.54037	-2.75556	1.99359	2.14298	8.14458
NSL438022	AusTRCF 306336	3.62813	2.04504	9.14847	9.87311	2.3529	-2.20534	2.10899	2.07894	10.3023
NSL438023	AusTRCF 306337	2.67077	1.65041	7.22688	7.67493	2.44608	-1.07654	2.53966	2.44036	8.37969
NSL438029	AusTRCF 306343	5.57848	1.54445	7.28143	9.09001	2.44713	-2.08565	1.50991	1.90441	9.47733
NSL438030	AusTRCF 306344	3.0387	2.02747	6.80267	7.4979	2.53346	-1.59842	1.99927	2.19764	8.11045
NSL438031	AusTRCF 306345	3.96814	2.3782	9.51041	10.4113	2.88823	-0.375358	2.53395	2.62562	11.0682
NSL438032	AusTRCF 306346	3.08521	1.44887	7.48118	8.0063	2.62948	-0.151478	3.35065	2.84332	8.99258
NSL438033	AusTRCF 306347	2.47112	1.55849	6.47467	6.88236	3.20072	-0.34211	4.46357	3.38401	8.80695
NSL438034	AusTRCF 306348	2.62799	1.2991	5.66208	6.1146	3.5159	-0.451078	4.8471	3.54178	8.51336
NSL438036	AusTRCF 306350	4.43161	1.02299	6.00137	7.29619	2.56974	-0.613948	2.89086	2.61366	8.22554
NSL438037	AusTRCF 306351	2.67204	1.64662	6.50453	7.00841	2.43383	-1.23056	2.1889	2.24285	7.67603
NSL438038	AusTRCF 306352	2.98444	1.11607	4.68297	5.35512	2.50149	-1.38166	2.51932	2.41917	6.34153
NSL438039	AusTRCF 306353	2.78987	1.29705	5.29941	5.86303	2.57537	-1.57428	2.68825	2.59362	6.93101
NSL438040	AusTRCF 306354	3.54707	1.31283	5.37225	6.28539	2.44631	-1.66855	2.07779	2.16585	6.92008
NSL438042	AusTRCF 306356	3.30339	1.18403	5.14403	5.92988	2.60629	-1.21978	2.41531	2.42347	6.8098
NSL438043	AusTRCF 306357	3.07341	1.27072	5.48571	6.1269	2.24328	-1.63952	2.80556	2.43958	7.01621
NSL52605	Oh7K	2.51011	1.0928	5.05219	5.43444	2.30534	-0.417291	5.00712	3.37425	7.72276
NSL53086	SC 212M	2.15099	1.95638	7.71922	8.04198	2.85804	1.01368	5.21238	3.59934	10.0728
NSL53094	SC 357	3.243	1.0778	6.8193	7.41435	2.08944	-1.81511	1.94049	1.9215	7.85204
NSL65863	B7	1.5054	1.53465	6.67696	6.79424	2.52522	-1.18457	3.6436	2.92135	8.03775
NSL65864	B8	1.53569	0.935164	7.08225	7.06546	2.92068	0.187778	5.54978	3.66536	9.45339
NSL65866	B14	3.39855	0.851932	4.3442	5.2683	3.33717	-0.890028	3.81715	3.18572	7.27761
NSL65868	B21	1.73995	1.51461	7.8005	7.93651	1.76188	-1.33723	3.96418	2.87285	9.02771
NSL65869	B38	3.93944	1.68133	7.63517	8.55653	3.70269	-1.0102	4.39938	3.46546	10.2587
NSL65871	I 205	1.55409	1.0352	5.50368	5.50632	2.56577	-0.245465	3.609	2.94885	7.05274
NSL65872	L 289	2.83525	0.791374	3.53419	4.21328	2.67224	-0.530262	4.85192	3.39116	6.92817
NSL65873	L317	3.15533	1.39524	6.21514	6.86855	2.95727	-0.365916	2.87191	2.77552	7.95621
NSL65874	Os420	2.2853	1.32774	7.39386	7.64773	2.36281	-1.49988	3.07755	2.59277	8.51862
NSL68211	Oh422	1.3993	1.64714	8.30878	8.39477	2.80939	-1.65407	2.78652	2.63058	9.20163
NSL68242	SC 212M	1.97053	1.80479	7.75929	7.98796	2.90025	1.04282	5.24262	3.61451	10.0544
NSL68252	SC 357	3.1346	1.00034	6.3061	6.87686	1.97725	-2.34552	1.66388	1.65516	7.23008
NSL81595	A238	6.56862	2.15845	8.68959	10.9483	3.87619	-0.828194	3.36201	3.21939	12.0415
NSL81596	A258	2.33721	1.22818	7.16583	7.42576	2.75283	-0.636051	3.36759	2.90124	8.61459
NSL81597	A648	3.55834	1.12396	6.13031	6.92858	3.07309	-1.31857	3.37111	2.98222	8.22551
NSL81598	A657	3.51782	1.15921	5.94856	6.76724	3.36462	-0.612945	3.31723	3.04652	8.23157
NSL81599	A659	2.09019	1.94789	7.91434	8.21164	1.80005	-1.73651	2.69791	2.19286	8.76704
NSL81600	A660	1.30862	2.02213	7.29869	7.43946	2.22863	-0.594773	4.90748	3.33142	9.1592
PI186182	INBRED 378	3.89371	1.35412	5.91352	6.96147	3.41567	0.341609	2.94404	2.99556	8.29527
PI186183	INBRED 379	2.9571	1.39428	5.95044	6.53749	2.8224	-0.793204	2.1978	2.44076	7.40593
PI186184	INBRED 381	3.54515	1.30326	6.36358	7.15802	2.7627	-0.906148	3.93858	3.06996	8.54115
PI186193	INBRED A-243-1	1.96705	1.42535	6.30722	6.50898	2.39678	0.0495106	5.26145	3.49255	8.69755
PI186196	INBRED 109	3.11614	0.694222	3.17145	4.04319	2.61749	-4.80687	1.7773	2.10278	4.95196
PI186197	INBRED 100	1.62556	0.856372	4.80451	4.80408	1.8366	-2.05373	3.02427	2.49024	5.90788
PI186199	INBRED 141	2.20231	3.03369	9.40451	9.94001	2.52094	-0.650273	3.6518	2.91115	10.8436
PI186215	INBRED 2-687	1.81328	1.56349	6.59778	6.77166	2.28478	0.834733	5.86583	3.69629	9.29192
PI186217	INBRED 19-86	1.98191	1.52315	6.81585	7.03004	1.89137	-0.24989	5.80141	3.59323	9.30868
PI186218	INBRED 34-1141	1.71059	1.56289	7.72724	7.86737	1.90915	-0.650964	4.77639	3.2196	9.34815
PI186219	INBRED 34-1181	2.50851	1.55367	8.3357	8.64395	2.55924	-0.16963	4.68859	3.30195	10.1556
PI186221	INBRED 39-1084	2.97066	1.09146	6.5162	7.00279	3.74379	-0.662401	4.43453	3.46061	9.01379
PI186223	INBRED 41-1781	3.75485	1.78399	8.10677	8.90204	2.4536	-0.64289	4.36547	3.10299	10.1016
PI186224	INBRED 42-492	2.48929	1.48517	7.90355	8.20433	2.39734	-0.399053	4.70124	3.2917	9.77677
PI186226	INBRED 305	2.84043	1.02868	5.97625	6.4247	2.79584	-0.992744	3.89788	3.0619	7.99691
PI186229	INBRED 321	2.88646	1.34513	7.81524	8.23864	2.07067	-0.15314	4.6945	3.24582	9.67374
PI198889	4F-182 BS 11	1.9777	1.11495	6.40845	6.56575	2.10214	-0.911191	4.46892	3.15379	8.16969
PI198892	4F-234 BX 4	3.38287	0.846276	6.09745	6.78553	3.58966	NA	7.20032	4.19163	10.605
PI198893	4F-240 BX 16	3.33511	1.41636	7.25917	7.89168	2.04049	-1.04386	3.50463	2.69643	8.79744
PI198894	4F-259 HQ	1.6205	1.2501	6.37523	6.45194	2.21506	1.45358	6.78329	3.98312	9.79997
PI198895	4F-285 TX 15	3.2082	0.585807	4.53057	5.24763	3.81411	-0.712935	4.88672	3.60111	8.06384
PI198896	4F-300 AD 3	2.76164	0.805572	5.74609	6.11008	2.52946	-1.41125	3.68557	2.91585	7.47405
PI198901	4F-342 CM 4	3.83437	1.2149	7.42618	8.23401	3.05008	-1.22338	3.09529	2.86248	9.24363
PI198902	4F-345 CN 12	3.63815	1.22235	8.20845	8.87105	3.23186	0.061536	5.47496	3.68512	10.9337
PI198906	4F-403 JV 15	1.5086	1.49589	5.86832	5.94057	1.12817	-0.685243	4.11473	2.88373	7.30214
PI200179	NY 3 (Neveh Yaar)	2.17613	1.11872	5.65959	5.89932	2.3218	-1.79687	2.86419	2.49693	6.86972
PI200181	NY 65 (Neveh Yaar)	2.29431	0.767539	4.80573	5.04645	2.54689	0.875838	4.66719	3.36608	7.41823
PI200182	NY 159 (Neveh Yaar)	3.27175	2.18633	8.41567	9.1114	1.88614	-0.150835	4.77967	3.25758	10.4578
PI200184	NY 166 (Neveh Yaar)	2.18761	2.20076	8.65547	9.01314	2.67943	-0.100676	4.89442	3.40977	10.5917
PI200185	NY 188 (Neveh Yaar)	3.30848	1.34017	6.23706	6.91535	2.82569	-0.0708824	4.49201	3.3137	8.68936
PI200187	NY 318 (Nevey Yaar)	2.19619	2.02595	7.14224	7.51691	2.81915	NA	NA	3.65218	9.77542
PI200188	NY 364 (Neveh Yaar)	2.07316	1.3852	6.47294	6.70961	2.77033	-0.174936	2.86956	2.71625	7.76524
PI200191	NY 476 (Neveh Yaar)	2.00003	1.24187	6.13549	6.33708	2.11847	0.182822	4.86238	3.3258	8.28171
PI200194	NY 971 (Neveh Yaar)	1.95114	1.91644	8.78996	9.0041	2.82574	0.234585	5.74169	3.69783	11.0245
PI200195	NY 992 (Neveh Yaar)	1.68629	1.07619	5.14915	5.22543	1.54285	-0.424537	4.16498	2.92144	6.78599
PI221733	A13-2 INBRED (POTCHEFSTROOM PEARL)	2.6524	2.74284	9.26926	9.85119	2.40611	0.528121	6.06277	3.74005	11.8225
PI221734	A14 INBRED (POTCHEFSTROOM PEARL)	2.49444	1.66328	7.99676	8.31647	2.09489	-0.789874	4.52168	3.14033	9.66548
PI221735	A15-1 INBRED (POTCHEFSTROOM PEARL)	3.8338	0.71458	4.47099	5.65722	3.54216	0.255745	3.68682	3.24242	7.67411
PI221736	A16-3-2 INBRED (POTCHEFSTROOM PEARL)	4.48225	0.737104	4.16307	5.86162	3.50262	0.557559	3.87116	3.34143	7.93918
PI221737	A17-1-1 INBRED (POTCHEFSTROOM PEARL)	1.99169	1.15644	8.09328	8.1763	2.31414	0.779451	5.26231	3.51288	10.0292
PI221739	A21-4-1 INBRED (HICKORY KING)	3.28128	1.24922	7.13061	7.72167	3.06177	-0.86796	3.83321	3.12894	9.09366
PI221743	N72-3-1-1 INBRED	1.39735	2.34462	9.224	9.43868	3.05413	-0.613003	4.90492	3.47726	11.0057
PI221747	E205-1-1-1 INBRED (S5 SYN. ANVELD)	3.15873	1.45877	8.76086	9.24721	2.57956	0.43448	5.2286	3.51054	10.9309
PI221750	E292-1-1-1 INB(S5 SYN ANVELD X MINN.706)	2.31116	2.42215	8.04748	8.53841	1.88978	-0.594044	3.34687	2.63189	9.36087
PI221773	A415-1-3 INBRED	3.62906	0.757654	4.18309	5.29818	4.03845	-1.82552	2.41063	3.03244	6.96801
PI221775	A436-1 INBRED	2.16382	1.72943	8.93277	9.17853	2.66757	-0.102324	3.27695	2.84352	10.0727
PI221788	E680-2-1-3(S5) INBRED	1.82619	1.0331	6.36464	6.43222	4.30157	-1.8402	3.36825	3.33822	8.37535
PI221789	E683-1-2-1(S5) INBRED	1.65675	1.01661	5.6318	5.66539	3.31836	-0.705961	2.99071	2.88237	7.03018
PI221794	E697-1-1-1(S5) INBRED	1.93676	2.32702	9.02175	9.32759	2.38338	-0.936309	3.19914	2.66543	10.0476
PI221805	A243-1-2(S10) INBRED (PERUVIAN)	3.40918	1.53991	7.86813	8.52471	3.21571	0.533001	6.26299	3.90559	11.0631
PI221820	C410-1(F11) INBRED (HOTNOT CROSSES)	1.9453	2.20147	8.81785	9.11147	2.35866	-0.489968	4.33031	3.15068	10.3143
PI221821	E680-3-1-1(S6) INBRED	2.34536	0.94884	5.46095	5.7439	4.57092	-1.9079	3.38747	3.43161	7.99757
PI236997	Inbred 6-907	1.98887	2.16741	9.73549	10.002	2.08677	-0.169556	3.14553	2.58889	10.6801
PI257506	F2	2.59105	2.27371	7.27346	7.83074	1.92666	-0.993512	4.23574	3.01563	9.0693
PI257507	F7	2.54974	1.80263	7.05136	7.46942	1.68369	-0.576021	4.61875	3.13906	8.93366
PI257508	F10	2.19005	1.22189	7.361	7.56321	2.83862	-1.14893	3.91033	3.09697	8.94448
PI257513	F115	1.96745	1.21354	8.17757	8.26375	2.26644	-1.46365	3.51455	2.77035	9.19956
PI257514	FV181	2.45444	0.811468	3.98275	4.35182	2.65258	-0.30335	5.54801	3.6023	7.50318
PI257516	F39	1.97795	2.39981	9.54433	9.88079	2.79684	-0.250445	4.76605	3.38405	11.3133
PI257517	FC46	2.04221	1.288	4.83882	5.05013	2.24872	-0.539211	4.02942	3.01808	6.72158
PI267166	2 KM 368 INBRED	1.51909	1.5544	6.73927	6.81857	2.57286	-0.219291	4.32624	3.19549	8.45387
PI267167	T8144 INBRED	1.54117	0.985562	7.00846	7.0037	2.15983	-1.75374	3.26892	2.62197	7.97807
PI267168	T8146 INBRED	2.28661	0.928808	6.28226	6.50549	2.43594	-0.702825	3.67621	2.91734	7.83921
PI267169	T8302 INBRED	3.23543	1.49688	8.13982	8.69282	2.77693	1.1394	5.0433	3.54327	10.5035
PI267170	T8354 INBRED	2.58177	1.15284	7.16635	7.47229	2.96404	-1.2848	3.2661	2.91501	8.6067
PI267171	T8445 INBRED	2.84047	1.70529	7.96672	8.4288	3.52509	1.28834	7.08974	4.16835	11.674
PI270297	B96	3.74597	2.19327	7.89171	8.81419	2.46774	0.364224	3.82266	3.02922	9.90931
PI303924	NO. 380	1.91376	1.89676	8.00319	8.24429	2.16446	-0.613387	2.63352	2.33957	8.88328
PI303925	NO. 1004 INBRED	4.39268	1.37347	6.27844	7.56915	2.9767	-1.6734	1.90041	2.39143	8.27029
PI303926	NO. 1019 INBRED	2.10409	1.26487	6.29673	6.53684	2.75814	-0.114073	4.2425	3.21962	8.26567
PI303927	NO. 1026 INBRED	2.18899	1.23266	5.36894	5.64086	3.10004	-0.459427	3.71736	3.11195	7.40981
PI303928	NO. 1032 INBRED	3.51059	1.75304	7.55265	8.33285	2.81743	-0.615628	3.68626	3.0063	9.48559
PI303929	NO. 1037 INBRED	2.66961	1.14034	5.88245	6.3067	2.67356	-2.12126	2.66081	2.54694	7.25216
PI303930	NO. 1049 INBRED	2.26369	1.12837	6.31815	6.5633	3.00327	-1.16595	3.24987	2.9146	7.88406
PI303932	NO. 1068 INBRED	2.45501	1.09129	6.69823	6.97737	2.61771	-1.23889	5.09828	3.44132	8.96267
PI303933	NO. 1070 INBRED	1.92745	1.02133	6.792	6.89231	2.54644	-0.717478	4.59476	3.28158	8.63024
PI303937	NO. 1175 INBRED	3.63487	0.892384	5.31009	6.2113	4.64584	0.120765	5.87059	4.01561	9.70334
PI303938	NO. 1185 INBRED	2.35172	0.6714	4.01959	4.39309	1.89778	-1.38378	3.61865	2.72759	5.91464
PI303939	NO. 1197 INBRED	3.16474	1.01858	6.55254	7.12592	2.38317	-1.01535	3.78574	2.94427	8.38041
PI303940	NO. 1201 INBRED	3.54351	1.48322	6.41422	7.25553	4.02814	0.265254	4.67255	3.63185	9.51193
PI303941	NO. 1266 INBRED	4.96603	1.3559	7.71912	9.08792	3.27357	1.18222	4.19266	3.2597	10.3955
PI303943	TN 53-1-2	1.98621	2.15546	8.39913	8.69464	2.34999	-1.59022	1.70526	1.95971	9.07971
PI340812	NY 121 (Neveh Yaar)	2.50731	1.37963	5.95659	6.38085	2.54999	-0.225645	3.59826	2.9282	7.73412
PI340813	NY 123 (Neveh Yaar)	1.27018	0.732012	3.49589	3.2613	1.97685	-0.705865	2.93047	2.41929	4.77588
PI340817	G3 T5	2.24369	0.941154	5.15019	5.34965	2.45149	0.417184	4.24061	3.1636	7.28277
PI340818	G3 T5a	1.68503	1.34888	6.21668	6.299	2.09381	0.253131	3.94739	2.97043	7.72945
PI340819	T9	1.70547	1.22003	6.68047	6.73911	2.46406	0.368253	4.52219	3.26247	8.51611
PI340821	G22 T122	2.48621	0.978954	5.49143	5.80822	2.71389	-0.637741	4.73046	3.35125	7.94905
PI340822	G6 T123	1.57442	1.11105	5.81133	5.81975	2.29445	0.683201	4.01216	3.07261	7.4961
PI340823	G14 T133	1.74223	1.74816	6.62226	6.77153	2.04709	-0.315166	2.94213	2.45802	7.62796
PI340824	G15 T134	1.65622	1.6193	6.93993	7.05387	2.04877	-0.0182313	4.58834	3.19412	8.63752
PI340825	G15 T134a	2.06763	1.4536	5.79813	6.02884	1.7242	0.0757495	4.61829	3.16267	7.80251
PI340826	T140	2.91119	1.08875	5.87048	6.39218	2.63248	-1.79373	3.30197	2.80741	7.59917
PI340827	T141	2.11151	1.72727	6.84773	7.17151	1.93687	-1.54646	2.04176	1.88642	7.66765
PI340829	T146	2.59774	1.47595	7.53906	7.91715	2.54786	-1.00176	2.97605	2.64757	8.77774
PI340830	T242	2.37118	1.00133	5.73748	6.03167	2.9503	-1.4068	4.15433	3.20281	7.85264
PI343953	PLS 61/10870 subline-1	2.28356	1.19532	6.46954	6.72838	1.98075	-1.35165	3.64795	2.76684	7.83967
PI369437	80-2	1.78109	1.14069	8.33722	8.39649	2.10847	-1.54699	2.77218	2.36679	9.01604
PI369438	K 10	1.97603	1.10925	7.97383	8.0807	2.73978	-1.37015	3.97588	3.0858	9.34247
PI369439	S 14	1.59562	1.53346	7.47597	7.54289	2.76877	-0.0381241	4.28018	3.22938	9.08137
PI369442	S 48	3.50794	1.76754	8.04667	8.78129	2.38878	-0.155778	2.97289	2.62674	9.55627
PI369443	S 61	3.09778	1.69369	7.95078	8.51176	2.70754	-0.354714	3.1403	2.80324	9.4583
PI369446	U 123	1.42916	0.901994	5.11672	5.04016	2.03005	1.73309	6.49258	3.91329	8.71442
PI391414	PH 9	3.36001	1.24483	6.76731	7.4296	2.3186	-1.01734	4.41892	3.10568	8.78935
PI391662	KUNG-70	1.02091	0.808352	3.32579	3.05681	3.16251	0.928942	6.92588	4.06817	8.27366
PI391663	T IEH 84	2.3671	1.42844	7.58036	7.87482	2.54187	-0.124103	3.88473	3.0245	9.14
PI391665	YING-55	2.32282	1.18918	6.93995	7.19611	2.23917	0.148141	3.16186	2.67764	8.18332
PI391666	YING-64	1.87512	1.37228	7.43696	7.61538	2.58255	0.683175	6.90449	4.00629	10.675
PI391667	CHI-503	2.03951	0.723093	4.19854	4.39277	2.80605	0.0699201	3.73866	3.05442	6.41634
PI391670	NIU 11	3.05243	1.91931	8.2757	8.83277	2.45685	-0.972003	2.12543	2.22604	9.37136
PI391672	YANG	2.13274	0.708514	6.17188	6.31685	2.68781	-1.18265	4.25073	3.17249	7.9892
PI391676	TUO 229	2.00304	2.10875	8.374	8.66788	2.12328	-1.9703	2.53997	2.23838	9.22731
PI391678	TZU-CHIAO-HSI-WU 105	2.61501	1.22557	5.48371	5.95417	2.60409	-0.809248	3.36496	2.83064	7.29901
PI391682	YE-CHI-HUNG	2.24706	0.93307	5.83138	6.03678	2.12499	-0.889876	3.24456	2.59738	7.14316
PI405705	CHAN 11 INBRED	1.94986	1.95983	7.12678	7.38493	2.50097	0.208023	4.2754	3.16596	8.86781
PI405707	HUA 94 INBRED	1.78666	1.51036	7.31602	7.42967	2.2165	-0.513393	4.03293	3.00922	8.71359
PI405709	TANG CHAO INBRED	2.28201	1.97559	7.73607	8.10107	2.69928	0.196807	4.73512	3.37134	9.76555
PI405713	DA JIN DING (JI 0018)	2.49766	1.27704	6.42666	6.81758	1.89431	-0.973441	3.68905	2.77008	7.91392
PI405714	HUO BAO MI (JI 0235)	3.28547	1.31347	6.40991	7.11479	2.84988	-0.289994	3.62109	3.01625	8.43992
PI406106	A14NW	1.72116	1.59553	9.23585	9.36577	2.16107	-0.197528	NA	3.76165	11.4759
PI406107	A57N	1.57664	1.32312	5.66317	5.73073	2.07504	1.13065	6.33778	3.8195	8.85928
PI406108	A98NW	1.82701	1.78333	9.88135	10.0426	2.47205	1.04604	7.595	4.17024	12.8708
PI406109	A166N	2.1242	0.727876	3.52099	3.76518	2.67596	-1.09904	2.32839	2.30574	4.90971
PI406110	A178N	2.91304	1.23791	5.03093	5.64901	2.34595	-1.22247	2.40024	2.28707	6.51417
PI406113	A266N	3.34051	0.92645	4.5481	5.41625	3.12727	-1.50945	2.6842	2.73477	6.74388
PI406115	A328NW	2.62531	0.830326	3.99908	4.49067	3.36811	-0.604858	3.71967	3.18201	6.67871
PI406122	A564N	2.63645	2.35221	7.16184	7.79415	3.30073	-0.824216	2.39395	2.72449	8.74406
PI406123	A579N	3.16321	1.74408	6.69422	7.38639	3.10406	-0.747591	2.7704	2.79782	8.43448
PI406124	A622N	3.01103	1.55888	8.46512	8.92492	2.59737	0.0593401	5.98007	3.73774	11.0225
PI406125	A641N	3.53101	0.917413	4.51044	5.53908	2.98472	-0.858603	3.44837	2.94952	7.15556
PI406126	A661N	4.1094	1.26199	5.94959	7.11487	2.87033	-1.45549	2.7465	2.6697	8.06898
PI406128	A691N	2.88907	1.10425	5.06172	5.62141	2.25937	-0.894949	3.49103	2.75356	6.9567
PI415078	4533. INBRED	1.99024	0.624638	2.55519	2.72706	2.79331	0.762445	5.86366	3.75288	7.1186
PI415079	4537. INBRED	2.72078	1.26318	5.49707	5.97497	2.15325	0.479426	5.90766	3.67354	8.7132
PI415080	4550. INBRED	3.22909	1.03736	4.30394	5.13113	NA	1.44363	5.70293	3.97732	8.94888
PI415081	4554. INBRED	3.70565	1.19292	5.28323	6.30834	3.95884	1.09578	5.27572	3.79456	9.20405
PI415082	4554 INBRED	2.54354	0.925692	3.84201	4.27341	3.69661	1.328	6.08637	3.96323	8.43878
PI415083	4562 INBRED	2.5796	0.847499	3.37859	3.93215	2.94901	1.11925	5.67172	3.74283	7.61462
PI415084	4564 INBRED	2.67704	1.72185	7.4091	7.90044	2.53585	1.2159	4.43967	3.32705	9.53727
PI415085	4566 INBRED	2.61622	1.89795	6.67721	7.21256	2.79732	0.901165	5.99317	3.79812	9.83765
PI415086	4578 INBRED	1.75334	1.28737	6.59136	6.71294	2.59044	-0.474799	5.36148	3.53783	8.89804
PI415087	4580 INBRED	1.6214	1.1722	6.14384	6.1931	2.49438	-0.405883	5.19748	3.4552	8.43927
PI415088	4581 INBRED	1.6223	1.3186	6.40932	6.49759	2.32494	-0.39307	5.2514	3.4605	8.6682
PI415089	4655 INBRED	1.63494	1.13066	6.36531	6.38404	2.24917	-0.659231	3.74458	2.87581	7.67486
PI415090	4659 INBRED	1.62163	0.812388	5.78885	5.77392	2.50504	-0.523369	3.61823	2.88312	7.2176
PI415091	4664 INBRED	1.86849	1.0837	6.45208	6.54552	2.08663	-0.668397	4.37502	3.10341	8.09818
PI427109	Eng-li Chih	3.34319	1.29618	6.06539	6.77866	2.87099	-0.223697	3.63023	2.99709	8.20184
PI427111	Chi-tan 120	1.92537	0.661916	3.80089	3.95701	1.89462	0.0417881	3.95523	2.92105	5.91763
PI433485	Prior A	2.36499	2.94936	8.06136	8.73478	2.53114	0.232976	6.83228	3.96413	11.354
PI433486	Prior B	1.95511	1.57254	8.43785	8.58508	2.53315	0.188937	3.48707	2.89094	9.61907
PI433487	Prior C	1.83412	1.57749	6.5301	6.71515	1.53019	0.91351	4.60956	3.19386	8.37128
PI459078	Honan no. 7	1.86364	1.90905	7.05091	7.32308	2.29856	-0.585719	3.52322	2.8224	8.40351
PI459080	Hwang no. 525	2.09541	1.32963	7.1042	7.31675	2.56459	-1.56754	2.44412	2.41699	8.04316
PI459082	Shansi no. 60	2.33582	1.07151	5.91488	6.21211	2.6439	-0.636668	2.75051	2.61194	7.2843
PI506254	Tzi 24	3.34727	1.55388	6.76301	7.4787	2.8629	0.164012	5.3749	3.60021	9.63064
PI508277	SD42	2.14086	0.799927	4.90692	5.13429	2.76585	-0.336643	4.18063	3.18358	7.12871
PI509542	B89	1.72593	1.61779	7.88573	8.01167	2.17583	-0.739528	3.43461	2.71275	8.97326
PI510674	ND261	3.16109	1.16077	4.98351	5.71195	2.67164	0.542582	5.5773	3.64511	8.46984
PI511309	NC252	2.9495	2.48672	8.05794	8.7451	3.43778	0.725233	6.75242	4.06035	11.5921
PI511310	NC254	2.2171	2.70444	8.01149	8.54771	2.63871	0.111623	6.53895	3.88823	11.0676
PI511313	GT113	1.68809	2.3925	8.11134	8.41008	2.75936	0.436456	5.16711	3.51912	10.2208
PI517968	Pa392	2.25914	0.998115	5.48081	5.73422	2.79814	-0.428735	4.76243	3.38111	7.91148
PI517971	Pa468	1.51904	1.13766	5.24206	5.24986	2.37919	0.5472	3.97882	3.04679	7.09212
PI517972	Pa877	1.69553	2.01483	8.38269	8.5721	1.91135	-0.439373	4.37022	3.05718	9.73281
PI517973	Pa879	1.573	2.08664	8.99262	9.17451	2.91246	0.715917	5.89634	3.77881	11.2977
PI517974	Pa880	1.61358	1.47308	7.26086	7.34229	2.60427	-0.698611	3.58674	2.91036	8.53024
PI518660	SD43	3.18316	0.992165	5.14975	5.86919	2.02849	-0.401096	2.92901	2.43874	6.80341
PI520770	W552	2.67088	1.08936	6.06327	6.47618	2.22569	-1.71616	2.99934	2.51846	7.41325
PI520771	W570	3.17588	1.66552	7.01963	7.67863	3.51106	-0.542979	4.57566	3.46276	9.59533
PI520772	W572	2.96169	0.613744	2.86966	3.78343	2.97399	-0.528576	2.6008	2.67429	5.37715
PI520774	NC264	3.06114	1.69543	7.57363	8.12241	2.20685	-2.31608	1.76242	1.92458	8.51462
PI522250	ND262	2.45209	0.709819	5.79743	6.05916	1.7222	-1.5792	2.73589	2.18106	6.7767
PI522252	ND264	2.55609	1.05377	6.53273	6.84888	2.33974	-0.207898	5.04952	3.40062	8.78993
PI524969	SD44	2.01228	1.02553	5.79584	5.97008	2.27098	-0.258775	3.36497	2.75064	7.20886
PI524970	SD46	1.94039	1.595	7.78001	8.01003	2.61752	-0.18814	5.2652	3.51779	9.9325
PI527699	B90	2.95571	1.20071	4.76706	5.41219	2.68573	-0.727133	3.14188	2.77087	6.72362
PI527700	B91	1.77691	0.857223	4.29317	4.37377	2.02482	1.05058	5.32672	3.52229	7.30231
PI531081	Pa356	2.53625	1.37974	6.4833	6.84816	2.36745	-0.231875	4.05261	3.03923	8.30071
PI531083	Pa891	3.45212	1.18732	6.77781	7.47115	2.7481	-0.44745	4.47841	3.28016	9.06466
PI531084	NC258	2.6123	1.07192	5.0225	5.49142	2.86336	-0.656778	2.75968	2.71251	6.71376
PI531085	NC262	1.90482	1.23966	6.46654	6.59443	2.56682	1.28937	6.52721	3.93394	9.73592
PI531509	R225	4.07986	1.41152	4.96963	6.29519	2.97078	0.0369585	3.60852	3.04185	7.80325
PI531510	R226	2.22562	1.14492	4.68083	4.98255	2.44994	-0.863609	4.40094	3.16735	6.99709
PI531511	R227	2.46878	1.46167	8.00069	8.28721	2.25578	0.0164715	5.52327	3.54295	10.2066
PI533658	SD101	4.91585	0.797323	5.5927	7.26983	3.4878	-0.19855	2.30934	2.81375	8.3192
PI533659	SD102	1.756	1.42889	6.65421	6.81918	1.66141	-0.817588	3.33593	2.55142	7.69225
PI535901	S 3	1.86988	1.69678	8.41281	8.57848	2.08786	0.577135	3.70551	2.89681	9.60998
PI535906	S 56	1.88723	1.32737	5.58508	5.73601	2.46493	-0.349048	3.94279	3.02377	7.36866
PI535913	S 17	2.30109	0.796661	4.7818	5.03498	2.60976	-1.87981	2.04296	2.11984	5.82645
PI535914	S 22	2.51364	0.93306	6.56705	6.88451	2.53955	-0.641366	4.07325	3.08816	8.34855
PI535916	S 37	3.41761	1.11617	6.6086	7.30542	2.46814	-1.58447	2.15595	2.24142	7.92384
PI535917	S 51	3.70882	0.744029	5.30324	6.23113	3.04023	-0.978236	2.85052	2.77208	7.43624
PI535919	S 59A	2.85992	1.55835	7.50664	7.9387	2.30853	0.851644	6.07764	3.75718	10.3226
PI535920	S 63	3.03787	1.18813	5.76247	6.37219	2.34233	-1.84231	2.53777	2.35402	7.16583
PI535921	S 65	1.96655	1.31495	7.75187	7.88788	1.88609	-0.0143586	3.90705	2.89236	8.99091
PI535923	S 90	1.77882	0.848731	5.23212	5.30342	1.71912	-3.94935	1.69703	1.42601	5.72239
PI535924	S 97	2.02724	1.30165	7.99441	8.12569	2.66895	-0.0913277	3.59824	2.95085	9.24861
PI535925	S 99	3.21165	1.44391	7.49534	8.05337	3.0411	1.1063	5.82016	3.79087	10.4763
PI535926	S 117	1.81418	2.18349	6.58072	6.92044	2.59425	-0.395465	3.75156	2.96525	8.25374
PI535927	S 125	1.55339	1.06908	6.95695	6.94806	2.16671	-0.770711	5.35479	3.46822	9.00161
PI537097	LH195	3.02624	2.97381	7.80639	8.68379	3.2808	0.571655	5.87476	3.80674	11.0079
PI537099	LH205	3.12444	2.06137	7.22322	7.92423	4.40346	0.551438	6.60784	4.14458	11.2594
PI538007	LH127	2.9073	1.09018	5.27034	5.85754	2.56851	-1.15759	3.98873	3.05422	7.44013
PI538008	LH163	3.51089	2.50759	8.14246	9.04451	2.55255	-1.09467	4.25303	3.14624	10.256
PI538009	LH196	2.6403	2.14205	5.92965	6.58524	3.43596	1.25503	6.86424	4.10683	10.2141
PI538010	LH206	2.88053	1.42091	5.898	6.45138	3.02146	-0.439408	5.18653	NA	8.77558
PI538011	LH220Ht	3.25578	0.642568	2.70902	3.89991	3.34789	-0.411445	5.16461	3.6024	7.22755
PI538229	SD53	3.56085	1.25167	6.34061	7.15316	4.08138	-1.06702	3.26105	3.25159	8.78869
PI538231	SD59	3.12573	2.00593	9.07836	9.65507	2.88786	0.35741	6.84484	4.00651	12.1743
PI538235	SD57	4.63974	0.82211	4.86403	6.49995	3.94156	-1.28855	3.64798	3.30738	8.37459
PI538237	SD63	2.95436	0.337454	0.778082	2.45712	2.62949	-0.601506	4.39434	3.2172	5.60686
PI538238	SD65	3.10982	0.840818	6.06088	6.63973	1.74557	-1.80896	1.76856	1.52675	7.02839
PI538239	SD69	3.03044	0.929477	4.62628	5.36338	3.39898	0.124747	3.57469	3.16953	7.28362
PI538242	SD106	1.69187	1.46592	6.04779	6.18648	2.74681	0.434456	4.45111	3.29943	8.10943
PI538244	SD108	2.93287	2.34663	7.60954	8.2824	2.56082	-0.96713	4.40304	3.19029	9.68068
PI539870	B92	2.35811	0.706075	3.18692	3.63534	2.94493	-0.44374	4.44093	3.29306	6.34997
PI539871	B93	4.28737	1.48434	8.39115	9.35771	2.16413	-0.966797	3.06884	2.49601	9.97139
PI539872	B94	4.67335	1.23779	5.88018	7.4115	3.10452	-0.975534	3.56025	3.02441	8.75094
PI539920	LH160	2.00904	0.724056	4.8794	4.99442	2.74683	-1.9023	3.84818	3.03473	6.79223
PI539921	LH162	1.97724	1.07112	5.24591	5.45536	2.28813	-1.70909	2.25137	2.17984	6.24295
PI539922	LH190	3.42755	1.88218	7.88769	8.61788	3.1262	0.100351	5.01775	3.53052	10.4494
PI539923	LH194	2.94977	1.86482	6.02088	6.73581	3.28453	0.180459	5.7441	3.76261	9.4406
PI539924	LH202	2.47373	0.865317	2.98665	3.42357	3.763	0.493107	6.17683	3.95833	8.0437
PI539925	LH191	3.2441	0.804681	3.37501	4.39147	3.72925	-0.245873	4.53584	3.55668	7.43949
PI539926	LH192	2.41584	1.83799	6.19613	6.6521	3.85403	0.843413	5.35968	3.78456	9.44676
PI539927	LH193	2.05759	1.52498	5.30924	5.58207	3.45526	0.629045	4.58479	3.52363	8.12175
PI539930	RS 710	2.88673	1.52763	8.24073	8.68138	3.00256	-0.688584	4.81656	3.4381	10.3442
PI542937	Ab18	1.80864	1.22315	5.67648	5.75854	2.89805	-0.411701	3.56154	3.01424	7.31922
PI542938	Ab610	2.31978	1.41038	6.50887	6.81448	2.58505	-0.0612792	3.90995	3.05512	8.23671
PI542953	T264	2.24314	3.22015	7.26972	8.06561	2.88961	-1.77882	2.6112	2.61714	8.86988
PI542955	Va4	1.93692	1.44091	8.03921	8.18271	2.29871	-0.857788	4.02285	3.00201	9.33903
PI542957	Va6	2.88871	1.0884	6.63556	7.08898	3.04526	-1.18395	4.26097	3.26601	8.75284
PI542959	Va33	1.43359	1.79245	6.85262	6.99543	3.22865	-0.647394	5.03283	3.54892	9.15476
PI543843	PHN34	2.76734	1.09814	6.18118	6.58841	2.88745	-0.330046	2.59589	2.65198	7.64553
PI543846	PHP76	1.70614	1.13065	5.67363	5.74481	2.73587	-2.2874	3.05055	2.71596	7.00488
PI543847	PHV07	2.72228	0.805483	4.53304	5.05694	3.36647	0.10215	6.77135	4.04137	9.09195
PI543849	PHW51	3.31072	0.978109	4.98882	5.75773	2.75784	-1.52199	4.68311	3.33099	7.84872
PI543850	PHW86	1.76381	2.02488	6.57306	6.84153	2.63075	0.180458	4.12164	3.16206	8.42248
PI544065	BCC03	1.71742	1.69078	6.56488	6.7392	2.52673	-0.794829	4.43212	3.21401	8.41268
PI546482	FBLA	2.70184	0.817938	4.54227	5.07207	2.79794	0.169843	2.48382	2.6306	6.34424
PI546483	6F629	3.76841	1.1032	5.33964	6.36852	2.61582	-0.793616	3.65622	2.92789	7.74704
PI546484	6M502A	2.77737	1.18382	6.61091	7.03173	3.41821	-1.09755	2.49177	2.80243	8.11476
PI546485	NL001	2.71066	1.13189	6.02097	6.46355	3.94694	-0.243617	5.56318	3.82256	9.35223
PI546494	ND265	2.36423	1.51088	6.7535	7.07756	2.28646	0.167052	3.64844	2.88787	8.28869
PI547086	LH128	2.60709	1.13079	4.46092	4.95896	2.29356	-0.355008	1.80477	2.03546	5.73613
PI547087	LH181	2.5986	1.28847	5.7849	6.2047	2.44207	-1.37216	2.70982	2.45587	7.13474
PI547088	LH208	3.19525	1.73905	6.38292	7.09555	2.52269	0.175765	5.30005	3.46116	9.09209
PI547089	LH212Ht	2.99938	0.960219	4.52237	5.18346	3.01738	-0.126248	5.14299	3.53913	7.89285
PI547090	LH213	2.98506	1.06309	5.01986	5.63364	2.7096	-0.400941	4.25306	3.18225	7.51883
PI547107	Lp215D	2.56532	1.10632	5.83108	6.19976	2.62119	-1.059	3.78289	2.99124	7.65598
PI548783	T171	3.43924	1.30748	6.23006	6.98862	3.13719	-0.713925	4.98382	3.50161	9.09156
PI548794	ND266	2.32577	0.793921	3.6527	4.03468	3.15771	0.299074	3.39734	3.05207	6.17611
PI548798	PHJ89	1.73094	1.47488	8.39742	8.48597	2.2617	-0.0871809	4.63407	3.25452	9.91454
PI548799	PHJ90	1.96309	1.64418	7.75961	7.9862	2.66967	-1.35914	3.10974	2.73246	8.91252
PI548800	PHK93	3.30927	1.5079	6.83438	7.53136	2.90324	-0.709118	4.55931	3.33386	9.23463
PI548801	PHM81	1.89369	1.09217	6.71822	6.81595	2.68757	-1.63351	1.94684	2.23764	7.49246
PI548802	PHN66	2.97392	1.41598	6.37379	6.95182	3.58385	-1.78473	4.018	3.31345	8.7164
PI548804	PHR55	2.82419	1.67803	4.51748	5.28246	2.40456	-1.03327	2.18706	2.2238	6.11824
PI548805	PHR58	2.97054	0.931256	5.73903	6.25696	2.65723	-0.934579	4.17165	3.1419	7.90117
PI548808	PHW30	2.60824	0.91586	5.92155	6.28022	1.94113	-1.57693	3.30175	2.5755	7.29231
PI548830	29MIBZ2	3.12977	1.24195	5.4733	6.15057	2.74213	-1.35119	2.50004	2.48108	7.09907
PI548839	MBUB	2.5042	1.84395	10.9412	11.2289	2.39022	-0.644612	6.26902	3.77751	13.0623
PI550440	B64	2.91082	1.22238	5.77077	6.31446	2.71614	-1.1595	3.46855	2.86988	7.59927
PI550442	Mo20W	1.52556	0.941793	4.163	4.1315	3.00091	0.90709	8.46941	4.40354	9.97091
PI550443	B49	2.16486	2.25835	7.77406	8.15854	2.05855	-1.18968	2.48751	2.29837	8.74202
PI550454	B52	3.16333	2.31041	9.09919	9.73599	2.93611	-0.257674	5.40913	3.61822	11.5282
PI550455	B67	1.84796	1.40997	7.45256	7.57679	2.3071	-0.70322	5.16616	3.42374	9.4476
PI550456	B69	3.07447	0.888368	5.30725	5.90796	2.8318	-0.647069	4.23397	3.20576	7.75011
PI550461	B14A	2.70369	0.901469	4.3203	4.83822	2.99371	-0.362154	4.10741	3.20486	7.00121
PI550462	B59	2.90561	1.11032	6.038	6.55401	3.48121	-0.211181	5.11629	3.62005	8.96954
PI550463	B65	1.52367	1.2843	7.04919	7.09508	2.77693	-0.00683173	4.06413	3.15078	8.62171
PI550464	B66	3.02421	0.934764	4.69788	5.37402	3.28571	-1.0123	3.05092	2.88923	6.89253
PI550465	B68	3.29463	1.10156	6.17588	6.83949	3.23011	-0.933734	4.85154	3.4778	8.94508
PI550467	B37	4.06028	1.12032	6.07839	7.1627	2.66038	-0.902564	3.19243	2.74778	8.21919
PI550468	B45	3.33854	1.17728	6.11079	6.80627	3.98543	-0.894773	4.02321	3.50454	8.95104
PI550469	B46	2.43832	0.805121	3.33508	3.73973	2.33666	-1.08345	3.17986	2.65345	5.3425
PI550470	B54	1.50879	2.3843	9.80324	10.0287	2.74816	-0.113901	4.85512	3.39187	11.4359
PI550471	B56	2.46893	0.879974	4.66036	5.02219	3.48053	-1.17566	3.13023	3.0261	6.80901
PI550472	B57	3.56574	1.83522	9.41027	10.0573	2.51254	0.0602603	4.7043	3.31477	11.3569
PI550483	B76	4.67276	0.836343	4.58375	6.36937	2.64018	0.81083	4.54974	3.3402	8.29112
PI550489	ND245	1.57933	1.01172	7.02686	7.03009	2.56366	-1.07314	2.65872	2.47695	7.87761
PI550490	ND246	1.58656	0.73841	5.16172	5.11241	1.87854	-1.59138	2.49594	2.10527	5.92687
PI550491	ND301	2.20508	1.77264	7.4004	7.71221	3.1443	-0.0571926	5.63708	3.70752	10.0475
PI550496	H102	3.48497	1.70671	6.4839	7.33135	2.84174	-1.90551	2.28474	2.46186	8.12744
PI550497	H103	1.79072	2.65433	7.98944	8.40912	2.371	-0.450781	3.40259	2.79137	9.32792
PI550503	ND247	4.67607	0.466505	4.38476	6.12114	2.89859	0.0025343	3.05107	2.80711	7.36387
PI550504	ND248	2.84405	0.689405	2.54877	3.38723	3.5604	-0.0282544	5.1191	3.67786	7.15658
PI550514	T61	2.44856	1.1947	4.96847	5.38417	2.74162	1.31387	6.29982	3.89976	8.84376
PI550517	T115	3.36144	2.58971	7.6526	8.55971	3.7023	0.535395	4.47903	3.52518	10.3349
PI550520	T224	2.96173	1.71565	7.1448	7.69877	3.42803	-0.347085	4.24475	3.36073	9.37716
PI550521	T226	1.66769	1.19682	6.33441	6.38011	2.781	1.21286	7.04563	4.07195	10.0074
PI550522	T232	1.77653	1.87516	9.1138	9.28204	1.68655	-0.0458142	4.83326	3.24163	10.5499
PI550526	H110	3.42156	1.63118	7.46068	8.1845	2.26419	-1.81567	1.90698	2.02051	8.62157
PI550527	H111	4.71488	1.16994	6.26901	7.71423	3.33621	-0.378027	3.6675	3.1349	9.11351
PI550530	ND249	NA	0.952961	4.52953	6.07758	4.08608	-0.882291	3.15273	3.23393	7.94642
PI550531	ND250	2.03679	1.69008	7.77377	7.99619	2.49216	0.448632	5.28118	3.52645	9.92066
PI550532	ND251	4.99788	0.773914	4.93247	6.80034	4.83582	-0.360229	4.09046	3.66264	9.26751
PI550540	ND252	2.20324	1.11689	8.67573	8.84338	2.83433	1.28392	5.50383	3.69155	10.8961
PI550541	ND253	1.91263	1.17237	6.35311	6.45408	2.16535	-1.14664	4.22441	3.06286	7.97232
PI550542	ND254	4.17506	0.780642	5.09721	6.41961	4.1398	-0.742085	3.63147	3.36864	8.41853
PI550552	ND304W	3.31384	0.741085	4.17603	5.16628	2.90451	0.392385	3.69018	3.09091	7.04767
PI550553	ND101	1.23822	0.433635	3.08106	2.76243	2.24994	-1.13938	5.93967	3.65852	6.8379
PI550554	ND256	1.91855	1.30462	4.96992	5.14817	2.40596	0.0674871	5.60385	3.59402	7.95383
PI550555	NC250	3.1981	1.56824	7.74859	8.31745	2.8582	0.333429	5.21867	3.55911	10.2437
PI550556	B88	4.41629	1.17296	6.0832	7.39335	3.51221	-0.208578	3.71239	3.22762	8.92844
PI550558	DE811	4.08775	2.27979	8.01783	9.09106	3.67034	-0.402391	4.15009	3.37655	10.6086
PI550561	ND257	3.55182	0.956758	6.88055	7.58163	3.19716	0.0310145	3.99472	3.2411	9.12627
PI550565	N190	2.53429	0.694972	3.77377	4.15278	2.35885	-0.0284728	4.59925	3.26571	6.63537
PI550566	N192	2.92477	2.98577	7.34253	8.26211	2.53579	0.769321	4.30542	3.24036	9.6976
PI550567	N193	2.08665	0.97194	5.64656	5.83002	2.69205	0.0391632	4.36681	3.25833	7.77786
PI550568	N194	1.54712	0.771128	4.64552	4.56967	2.51073	0.0822375	4.75348	3.35148	7.05711
PI550571	ND259	1.88613	1.32286	6.91071	7.04265	2.02593	0.0068781	5.54296	3.53621	9.19327
PI550573	ND260	2.34178	1.73253	8.02775	8.34471	2.12105	-0.217818	3.73671	2.87523	9.38148
PI550695	L 155	1.91526	1.28982	6.42363	6.60278	2.04661	-1.60973	2.40549	2.14512	7.27064
PI550909	89291	3.07477	0.885884	5.50884	6.12671	2.51898	-1.09234	3.01149	2.65769	7.20825
PI550911	89302	0.828937	0.934338	4.82501	4.61525	2.71547	0.890372	7.99653	4.28283	9.65642
PI550917	88094	3.4376	1.312	7.95092	8.55659	3.55734	-1.27709	3.01924	3.03208	9.66727
PI550918	88069	2.56615	2.84323	10.3761	10.907	2.76365	0.29248	5.79689	3.71184	12.6488
PI552815	LH215	3.07147	1.59216	6.42544	7.03884	3.12869	0.16096	4.21282	3.28149	8.7886
PI553055	OC2	2.63772	0.615623	3.48397	4.00134	3.07923	-0.527914	3.85816	3.15398	6.31507
PI553056	OC3	1.50171	0.673638	3.14178	3.02726	2.00186	-2.26611	2.62508	2.19422	4.35869
PI553057	OC4	2.91319	1.26333	5.51804	6.0924	1.95479	0.0300908	4.06418	2.90211	7.48782
PI553059	OC6	1.59275	1.20744	6.76281	6.80322	2.51224	-1.37962	4.20409	3.09573	8.3206
PI553063	OC10	2.29138	0.711238	2.73656	3.12071	4.239	-0.666422	5.25942	3.78532	7.36632
PI554612	LH209	3.22549	1.34139	6.17328	6.84216	3.71832	0.0647533	5.71812	3.8714	9.77204
PI554615	MM402A	2.3543	1.54907	6.66685	7.03658	2.34961	0.806456	6.39203	3.84291	9.83828
PI554616	3IBZ2	3.11596	1.27033	6.46829	7.0861	2.74503	-1.56675	2.49087	2.50168	7.92973
PI555650	LIBC 4	3.20122	0.741239	3.49234	4.45119	2.2224	-1.4024	2.05733	2.04594	5.27318
PI555651	83IBI3	1.88325	1.56279	7.29824	7.49166	2.34816	NA	3.11614	2.73463	8.4778
PI555660	LH214	2.82122	1.09927	5.09731	5.617	3.12681	-0.295676	4.60626	3.40962	7.91822
PI558516	Mo7	3.14905	1.70442	8.02393	8.57336	3.46496	-0.507517	4.88406	3.5682	10.4466
PI558517	Mo10	3.19933	2.24487	9.67619	10.286	2.34726	0.546283	5.22557	3.49817	11.7676
PI558518	Mo15W	2.88196	1.19055	8.50507	8.88053	2.78152	0.381998	6.64942	3.94956	11.4243
PI558521	Mo2RF	2.05468	0.721045	3.54191	3.71446	2.54357	-0.85643	4.01424	3.06071	5.95733
PI558522	Mo3	2.35022	1.7932	7.40747	7.77824	2.10873	-0.384938	4.38938	3.13867	9.13165
PI558524	Mo6	3.7044	0.962498	5.80202	6.69391	3.85625	-0.643428	4.56434	3.54019	8.89559
PI558526	Mo9W	3.48353	0.966143	5.02874	5.93153	3.23172	-0.450063	4.85168	3.49905	8.26007
PI558527	Mo11	1.01022	1.78128	8.94562	8.98794	2.98406	-0.0216505	3.86733	3.14123	10.1987
PI558530	Mo14W	1.40088	2.0066	9.92926	10.0622	3.28203	0.948622	6.02262	3.87163	12.2056
PI558531	Mo16W	2.61346	1.37042	8.08268	8.40304	2.38299	0.719952	5.40683	3.56224	10.3261
PI558532	Mo17	3.95917	1.41585	7.28156	8.17726	3.00418	-0.675853	3.50547	2.99167	9.36626
PI559375	LH222	3.49687	2.03101	7.59998	8.43434	3.58669	1.73349	6.29634	4.03485	11.3166
PI559380	ICI 193	3.05681	1.11458	5.81735	6.41257	3.09521	-1.2569	3.26468	2.93245	7.79413
PI559381	ICI 441	2.88906	1.83342	6.9792	7.57485	3.50449	0.254471	4.92498	3.58819	9.70521
PI559382	ICI 740	3.14127	2.03624	7.58309	8.24723	3.30174	0.273119	5.17405	3.57128	10.2083
PI559383	ICI 893	1.56234	1.78763	6.76716	6.89937	2.59905	0.685112	6.2105	3.81674	9.68468
PI559916	CS405	3.6328	NA	6.11108	7.36538	3.57759	-0.503729	3.1408	3.07682	8.74396
PI559918	NQ508	3.27279	1.07526	6.18324	6.83598	3.37265	-1.38539	4.10218	3.2782	8.57324
PI559919	OQ101	1.7696	2.11672	10.6314	10.7969	3.59545	0.83897	4.69604	3.57404	12.3468
PI559920	OQ403	1.46609	3.23628	7.78232	8.36142	2.19472	-1.30356	2.89767	2.48013	9.06033
PI559921	OS602	2.56732	1.15564	4.71527	5.18939	3.59073	0.360488	5.13776	3.6867	8.20124
PI559935	PHBA6	2.98838	1.00021	6.82223	7.29582	2.91205	0.651911	5.48855	3.66102	9.60632
PI559944	PHP85	2.83651	1.35472	6.58477	7.05167	2.70733	-0.646768	4.49939	3.2643	8.77242
PI559945	PHPR5	3.21322	1.32993	6.67673	7.29652	2.70096	-1.21272	3.37179	2.83368	8.44277
PI559946	PHR30	1.82644	1.49148	8.57062	8.68008	2.84396	-0.273985	3.58992	2.99798	9.7896
PI559949	PHT69	3.2585	0.716955	4.37989	5.20122	2.5761	-0.656683	4.40909	3.20111	7.24133
PI559952	PHV53	1.51197	2.08674	9.3555	9.50625	1.75204	-1.24838	2.91434	2.28877	10.04
PI559953	PHVA9	2.97966	1.13045	6.1166	6.66422	2.48084	0.940206	4.991	3.46728	8.77316
PI559954	PHWG5	3.81181	1.01682	6.40154	7.26813	3.00711	-0.536291	4.82871	3.43206	9.18078
PI560074	Pa759	3.43677	1.0685	5.75046	6.51859	3.33673	-0.906506	3.81093	3.19658	8.21959
PI560075	Pa760	3.05248	0.955598	4.25932	4.99228	3.33085	-1.2373	2.96224	2.95025	6.66045
PI560081	Pa778	2.48378	1.04523	4.89809	5.30994	2.6149	-1.71283	2.64107	2.3586	6.14601
PI560082	Pa860	3.84568	1.95369	8.6851	9.50379	2.93522	-2.12337	2.48383	2.57948	10.1944
PI560316	CS608	2.71831	1.4281	5.85291	6.3889	3.71907	-0.816091	3.77784	3.30124	8.2492
PI561516	AR204	3.28672	2.13947	7.75494	8.50011	4.25737	0.466938	5.6733	3.91837	11.0735
PI561523	AR234	1.74827	2.56204	8.65077	8.98544	2.72986	-0.396609	4.00677	3.09824	10.1696
PI561526	AR250	2.47152	2.1469	7.37932	7.85786	3.24329	-0.121015	4.48541	3.39671	9.58423
PI561527	AR254	1.66114	1.43811	6.8478	6.91395	2.21985	-0.711916	4.72646	3.2564	8.6022
PI561529	AR266	1.54153	1.02902	6.56984	6.58455	2.91129	1.50328	7.25768	4.15926	10.3617
PI561533	AR276	1.50762	1.95537	8.43594	8.58573	1.61396	0.823601	5.46854	3.52276	10.3887
PI561565	B95	1.72239	1.33693	7.47345	7.57346	2.28162	0.117515	4.2436	3.11624	8.9818
PI561604	90176	2.89073	1.11525	5.25584	5.82003	3.35508	-0.107414	4.96631	3.55779	8.30125
PI561694	NYRD4058	3.55197	1.56979	8.79333	9.44913	2.83467	-0.961032	3.93103	3.10458	10.5889
PI561695	NYLB31	3.47583	2.0106	7.63715	8.4335	4.04662	-0.169142	4.95622	3.68956	10.578
PI564682	B97	2.41927	0.805126	4.83611	5.12403	1.9948	0.942278	5.95728	3.71088	8.21359
PI564852	B101	3.03289	1.2981	7.92597	8.38766	3.76633	-1.08422	4.08438	3.38669	9.98979
PI568158	N199	2.94325	1.71447	6.51958	7.12092	2.42074	-0.994576	3.49649	2.82361	8.22022
PI568159	N200	3.62656	1.96955	7.30981	8.17075	3.11459	-0.941807	3.59582	3.05771	9.39894
PI572413	Oh599	1.64155	0.856548	4.95772	4.97486	2.68391	0.219848	3.62627	2.99084	6.74407
PI573098	Oh603	1.4676	1.61148	6.83197	6.90552	2.6978	0.391627	5.74118	3.68866	9.37948
PI583350	Mo45	NA	1.08585	5.33934	6.53902	3.60346	-1.11889	2.21648	2.78483	7.69047
PI583352	Mo47	1.76317	1.80749	7.45516	7.67769	2.55474	-0.37048	5.21153	3.45918	9.51787
PI583774	ML606	1.74849	1.6312	9.90323	10.0358	2.53043	-0.477486	5.03209	3.41986	11.4688
PI583846	H126W	2.50602	1.25873	5.04715	5.43357	2.73055	-0.48915	3.82656	3.03056	7.14195
PI583847	H125	2.68858	2.68621	7.10425	7.83085	3.17642	0.552613	5.82406	3.78434	10.2751
PI584528	B99	2.58797	1.51446	5.41156	5.88486	2.28761	0.789778	5.4034	3.54858	8.37255
PI584529	B100	3.03505	1.44832	7.54393	8.05257	3.02755	0.540586	5.52347	3.68109	10.276
PI587124	CM105	2.59665	0.350721	1.68503	2.54623	3.08894	-0.163764	4.55614	3.38405	6.04072
PI587125	CO109	2.73033	1.29603	7.0814	7.48571	2.0899	0.127602	4.66886	3.26308	9.08321
PI587127	H105W	3.30962	1.06456	5.84536	6.55412	3.58176	-0.585295	3.10998	3.0639	8.06768
PI587128	H84	3.51105	0.985821	6.73771	7.43286	2.32352	-1.32588	3.15525	2.63042	8.39065
PI587129	H99	4.06071	1.78424	9.8007	10.6081	2.74982	-1.0889	2.81453	2.6609	11.2635
PI587137	Ms71	3.02112	1.20967	6.77908	7.32661	2.74942	-1.09904	3.38181	2.88646	8.47048
PI587138	A554	1.72543	1.58793	7.38672	7.53741	2.78795	0.271434	3.67554	3.03984	8.83587
PI587139	A619	2.6577	2.09577	8.82454	9.2682	2.68492	1.22135	6.89223	4.03516	11.9423
PI587140	A632	3.00611	0.763723	4.47553	5.18194	2.91189	-1.41529	3.21891	2.8641	6.65407
PI587141	A654	3.14781	1.02788	6.5758	7.13171	1.75104	-2.14899	1.60623	1.41306	7.4392
PI587142	A679	2.53083	1.25357	4.5636	5.07367	2.61876	0.510252	5.98642	3.75846	8.30924
PI587143	A682	3.3587	1.60198	6.78438	7.5234	2.60817	-0.768062	3.17403	2.76401	8.53721
PI587144	Mo24W	3.46861	1.07079	4.87197	5.77582	3.98888	-0.312294	3.08864	3.19865	7.61073
PI587145	NC268	4.12359	1.26936	8.40772	9.26126	3.30042	-0.551929	7.2592	4.14096	12.1683
PI587147	Pa91	3.1857	1.4634	6.72688	7.34271	2.98658	-1.28164	3.29785	2.90016	8.53631
PI587149	Va26	3.65899	0.95293	6.7252	7.50201	3.10848	-0.793132	5.52205	3.65911	9.75044
PI587150	Va35	1.58816	1.08784	5.22112	5.25356	2.39892	-1.29	4.25556	3.09926	7.12568
PI587151	Va102	1.61591	0.798983	4.00459	4.03066	2.50103	-0.982	3.76005	2.93379	5.98985
PI587152	W64A	1.67569	1.40082	7.49449	7.58985	2.13769	-2.03768	2.582	2.2784	8.2284
PI587153	W117	3.30389	1.19873	7.06114	7.67933	2.87204	0.288036	4.88436	3.4521	9.54905
PI587154	W153R	3.92539	0.957162	6.63744	7.5558	2.63504	-2.66239	2.5643	2.47618	8.31774
PI587155	W182BN	2.11101	1.23814	6.34872	6.55593	1.82928	-0.247253	4.55999	3.15225	8.18492
PI591014	BO385Y	3.86781	1.96899	9.79001	10.5604	2.52605	-0.140239	4.52806	3.27232	11.7514
PI592733	R228	1.99562	2.00326	8.27786	8.56146	2.10533	-1.28859	3.01584	2.49547	9.28059
PI592734	R229	2.98912	2.01301	6.93772	7.60126	3.66599	0.0929054	5.72961	3.8188	10.2255
PI592735	R230	2.51446	1.37553	6.21337	6.62261	2.67414	0.169686	5.81983	3.70606	9.21532
PI592741	N801w	NA	1.5957	6.56516	8.11212	4.4071	0.990223	6.23232	4.07914	11.198
PI593007	Hi25	2.74466	0.889586	4.2695	4.79081	3.19905	-0.869071	3.66385	3.10206	6.80137
PI593010	Hi28	1.6773	1.00594	5.26196	5.31061	2.5694	0.249529	4.95161	3.41013	7.64613
PI593011	Hi29	2.69323	1.27691	6.9039	7.31195	2.66174	0.0586858	4.61896	3.33488	9.02616
PI593013	Hi31	2.98936	0.839179	4.28336	4.9775	3.01904	-1.49871	3.05487	2.83238	6.51149
PI593014	Hi33	2.61666	1.25591	6.32596	6.73424	2.32112	-0.556046	4.84166	3.31431	8.56256
PI593017	Hi39	1.82319	0.74423	3.50924	3.55045	2.8758	-1.4587	3.91428	3.09854	5.93797
PI593460	991	3.58488	1.1652	6.07793	6.93641	3.11458	-0.2141	5.23745	3.58773	9.21363
PI594045	B102	3.17377	1.08666	6.36996	6.93292	2.91527	0.153787	5.01732	3.48181	9.00785
PI594046	B103	1.76353	2.56944	8.00407	8.39164	3.15532	-0.372399	3.13408	2.93365	9.49265
PI594047	B104	3.44363	1.01101	5.6596	6.42936	3.94917	-1.37209	3.17458	3.27814	8.25469
PI594048	B105	1.96398	1.50155	7.21467	7.43728	2.72468	-0.748098	5.80862	3.68819	9.76117
PI594049	B106	2.51049	1.16778	5.35754	5.72654	2.5585	-0.608734	4.88056	3.3708	7.87534
PI594050	N501	2.93444	1.07528	5.40111	5.9645	3.11958	-0.288848	4.78972	3.45422	8.258
PI594051	N502	3.41467	0.89871	4.11238	5.08759	3.29691	0.346242	4.58467	3.44498	7.60182
PI594052	N503	3.18616	1.03244	5.32456	6.0113	3.09212	-1.76489	3.54199	3.03875	7.55829
PI594053	N504	4.11866	1.06957	6.31665	7.40476	2.47366	-1.13803	3.31887	2.75296	8.4533
PI594054	N505	1.74169	1.01535	5.14071	5.2055	2.01813	-0.398416	3.62129	2.76143	6.60482
PI594055	N506	4.49602	1.87122	7.58341	8.81975	3.23079	-1.00552	2.77782	2.81624	9.78551
PI594056	N507	1.79739	1.37488	6.31646	6.44671	1.80658	0.332754	5.69146	3.55726	8.80193
PI594057	N508	1.55095	1.09235	5.32259	5.34496	1.63216	-0.672145	3.28852	2.50373	6.40196
PI594058	N509	1.6545	0.949027	4.46514	4.45385	1.86537	-0.0744336	6.25402	3.72619	7.89443
PI594059	N510	3.04616	0.885948	4.64252	5.28849	2.39102	-0.380015	4.78338	3.30603	7.50841
PI594060	N511	3.63959	1.11595	5.63623	6.55126	3.01031	-0.572054	4.10619	3.20976	8.26169
PI594061	N512	1.68839	1.11184	5.44204	5.46639	1.80988	-0.510097	4.04024	2.90426	7.04901
PI594062	N513	3.68258	1.56157	9.3335	9.9785	2.60146	0.309486	5.8575	3.71019	11.8708
PI594063	N514	3.79277	1.46827	8.72685	9.43274	2.64372	0.320557	5.88408	3.7218	11.4492
PI594064	N515	3.43237	1.44256	5.99855	6.82119	3.19105	-1.19804	3.5056	3.04104	8.2847
PI594065	N516	2.70579	1.40763	7.15067	7.54451	2.75851	0.599943	7.43264	4.14156	10.9943
PI594066	N517	3.30643	1.13192	5.3622	6.13262	2.94928	-0.717103	4.27628	3.24469	8.0059
PI594067	N518	4.12096	0.706157	2.88623	4.7295	2.87486	-0.612129	3.88592	3.07717	6.74249
PI594068	N519	3.16e-05	1.60355	6.84798	6.77387	1.81863	1.73813	6.20689	3.85683	9.62123
PI594069	N520	3.23924	1.31946	5.5601	6.27887	3.31232	-0.299659	3.50649	3.09564	7.88961
PI594070	N521	2.85265	1.55217	6.08367	6.63937	3.35788	-0.326398	3.79663	3.20848	8.34287
PI594071	N523	1.65869	1.37792	8.1819	8.24541	2.39819	-2.26133	2.65695	2.39959	8.9412
PI594072	N524	2.93455	0.768128	4.11212	4.76225	2.54911	-1.71942	3.07841	2.66993	6.11506
PI594073	N525	4.15752	0.777962	4.03891	5.5803	3.27499	-0.764204	4.62992	3.42689	7.95378
PI594074	N526	2.04439	0.901365	3.70248	3.89248	2.21018	0.474063	4.85607	3.33808	6.64674
PI594075	N528	4.4708	0.903535	5.73266	7.07613	3.39028	-0.23377	4.86578	3.52635	9.20922
PI594076	N529	2.61924	1.71191	8.09938	8.4769	3.61785	-0.97664	3.77164	3.24593	9.93545
PI594077	N530	2.46609	1.46924	6.7918	7.13117	3.15168	-0.955105	3.27105	2.94006	8.39676
PI594078	N532	2.45118	0.959976	3.68436	4.1095	3.78122	-0.605161	3.36034	3.06031	6.20529
PI594079	N533	2.35879	0.929121	3.56593	3.96231	4.02257	-0.174848	3.91412	3.40554	6.8715
PI594080	N534	1.17423	2.09656	10.0694	10.1845	2.93378	-0.916823	3.98302	3.13466	11.3034
PI594081	N535	2.45704	0.921109	2.69819	3.28508	3.04196	-0.230987	3.94919	3.16852	5.91489
PI594082	N536	3.20678	1.30877	8.17051	8.6802	2.70445	0.505787	5.76138	3.69566	10.7768
PI594083	N537	3.29821	1.22357	7.34348	7.92468	2.58894	0.169397	5.311	3.535	9.87636
PI594084	N538	3.56525	1.5159	9.16791	9.78782	2.64924	0.301509	5.4123	3.57846	11.4998
PI594085	N539	3.11277	1.46031	8.31475	8.81691	2.97089	0.339866	5.42079	3.63812	10.7835
PI594086	N540	3.02655	1.34958	7.54004	8.02351	2.69764	0.236682	5.37437	3.58254	10.0179
PI594088	N542	2.68812	1.23155	5.34629	5.81809	2.19252	-0.960945	3.54159	2.77087	7.12029
PI594090	N544	2.92804	1.74818	7.55937	8.08631	2.36458	-0.45111	4.23228	3.12244	9.40733
PI594091	N545	2.83395	1.36355	7.70308	8.10742	2.394	0.225243	5.85858	3.67668	10.315
PI595366	N209	1.61577	1.15444	6.1863	6.21648	2.87204	-0.0838167	6.35647	3.87724	9.36368
PI595367	N215	1.47154	0.785272	3.52972	3.45828	2.53329	-0.321913	3.88466	3.01538	5.73761
PI595569	CML 300	2.88485	1.46737	5.77919	6.38925	2.87629	0.185486	3.69795	3.06934	7.91359
PI595616	ZS01250	2.6696	0.765803	5.61847	6.01438	2.51806	-0.200542	3.48339	2.86979	7.37187
PI596355	N216	1.56279	0.819124	4.49397	4.43112	2.29636	0.545477	4.57556	3.25832	6.77689
PI596356	N217	3.46742	0.926952	4.15969	5.15128	3.2465	-0.837239	3.7975	3.15724	7.12289
PI596357	N218	2.89282	1.51678	8.21919	8.63694	2.84636	-0.607844	5.74215	3.67984	10.7114
PI596499	OC12	2.28395	NA	9.35061	9.80161	2.72718	0.556205	4.24198	3.23171	11.0616
PI596500	OC13	2.4981	1.64567	7.62739	7.97019	2.15387	-0.39408	4.53508	3.19217	9.35976
PI596501	OC14	3.63708	1.06949	7.11559	7.8532	2.77457	-0.890404	3.90767	3.07284	9.15729
PI596502	OC15	2.9722	0.968386	5.6536	6.21421	2.73922	0.262848	4.53927	3.32633	8.17291
PI596503	OC16	2.9623	1.19469	6.12915	6.65605	2.40817	-1.13292	3.91716	2.9781	8.08294
PI596505	OC18	3.24687	1.31437	6.79605	7.41399	2.76147	-0.740538	5.31868	3.54204	9.475
PI596627	Mp710	1.74209	0.805917	4.33129	4.38706	2.62385	-0.380265	4.28874	3.19233	6.59777
PI596629	Mp712	2.24353	1.18391	5.78152	6.04237	2.85594	0.0526022	4.7677	3.41005	8.21539
PI597578	N546	2.29472	0.775728	3.51353	3.86396	2.88518	0.650268	5.92475	3.77505	7.6905
PI597925	B107	1.81771	1.01662	5.9688	6.06565	2.38089	-0.972918	4.64622	3.25122	7.93666
PI597926	B108	2.74992	0.778124	4.25949	4.82326	3.25989	0.607725	5.7764	3.78755	8.22231
PI597927	B109	2.6795	1.7169	6.74613	7.21703	2.04698	NA	NA	NA	NA
PI600729	LP1 NR HT	3.98205	1.11336	6.74456	7.68487	3.40577	-1.00444	4.3151	3.3604	9.41266
PI600751	Seagull Seventeen	3.37245	1.32715	6.50968	7.20288	2.99104	-0.755527	3.76928	3.07915	8.61895
PI600772	FR19	4.30858	0.812557	5.56465	6.84289	4.08561	0.655459	3.40494	3.35393	8.70042
PI600791	LH38	1.99608	2.26999	11.3816	11.6556	2.192	0.00913118	5.64398	3.58301	13.1172
PI600944	LH39	3.05966	1.42633	7.5949	8.116	3.33273	-0.363157	5.8232	3.73953	10.3997
PI600954	LH119	2.95207	1.92562	6.81486	7.45162	3.13853	0.883288	6.42397	3.94665	10.3541
PI600955	LH51	2.52456	0.969058	4.80313	5.18363	2.39357	-0.815772	3.30172	2.73134	6.5616
PI600956	MDF-13D	2.83217	1.01164	4.23947	4.83913	2.70444	0.815529	5.2548	3.56147	7.70362
PI600957	LH74	3.03531	1.30981	6.70637	7.27679	3.67171	-0.354252	5.83002	3.84381	9.98311
PI600958	FAPW	3.98214	0.805744	5.26683	6.40659	2.70322	-1.51388	4.06356	3.10785	7.96817
PI600959	LH145	2.70812	0.420718	2.0766	2.96555	3.15941	-0.96121	3.06141	2.89995	5.2263
PI600981	PHG39	3.15154	1.02438	5.73355	6.35158	2.79192	-1.80317	2.60762	2.56188	7.35543
PI601004	LH132	2.52195	1.99432	6.4964	6.98769	2.76178	0.261211	4.07019	3.15695	8.55987
PI601005	207	1.94638	1.4004	6.91938	7.11011	2.41888	-1.38162	3.32125	2.74887	8.18626
PI601007	BO9	2.54132	0.698016	4.48575	4.91339	2.60801	-0.544007	4.32308	3.19571	7.00885
PI601008	PHG35	1.72949	1.41314	7.87092	7.97392	2.70867	-0.394088	3.25047	2.83354	9.01213
PI601009	PHB47	2.41436	1.47932	6.49527	6.85513	2.5009	0.545805	4.48951	3.23087	8.49588
PI601026	F42	2.7872	2.30197	6.72745	7.38997	3.52066	0.676517	6.48115	3.99815	10.4694
PI601037	G80	2.4178	0.854464	4.93495	5.27578	2.60903	-0.98713	4.11415	3.11595	7.1208
PI601079	LH123HT	2.42986	0.811282	3.70435	4.08393	2.28657	-0.444298	4.84119	3.31697	6.69908
PI601080	CR1HT	3.3765	0.775973	5.31963	6.06633	2.04138	-0.840273	4.53921	3.16867	7.81618
PI601150	PHG71	1.55422	1.55971	6.8038	6.92705	2.72673	-1.21131	4.22587	3.16998	8.51593
PI601159	6103	3.1643	1.13083	6.32426	6.91766	2.9281	-1.25803	3.02948	2.78457	8.05734
PI601170	LH82	1.46314	1.31114	6.89297	6.94956	1.66971	0.380012	3.97317	2.98402	8.28042
PI601171	LH93	2.87665	1.06604	5.54235	6.06842	3.20377	0.168239	5.33031	3.64452	8.70803
PI601172	HBA1	2.74928	0.90453	3.06071	3.78825	2.78816	-1.66368	2.3227	2.44252	5.13501
PI601190	Q381	1.87554	1.33876	6.42026	6.59226	2.38218	-1.61139	3.08841	2.62259	7.62268
PI601191	DJ7	2.63404	2.14024	6.16329	6.80442	3.27606	0.361568	6.04452	3.87485	9.70885
PI601208	IB014	3.61097	1.88217	7.79035	8.60987	3.24572	-1.93908	1.75425	2.47078	9.27986
PI601209	MBNA	3.52908	1.58451	6.83781	7.67523	2.45082	-0.276224	4.24179	3.14015	9.06082
PI601210	78004	2.82216	1.1277	5.79331	6.28383	3.19893	0.0589578	5.68736	3.73701	9.06631
PI601211	78010	2.95264	1.09348	6.18955	6.69732	2.9841	-0.0319732	6.73023	3.98334	9.9593
PI601229	PHG83	3.26666	0.78034	4.61664	5.40241	2.29313	-1.64094	2.39097	2.22674	6.28163
PI601269	5707	2.34162	0.969884	4.42903	4.75073	2.57884	-1.28506	2.58543	2.45135	5.92391
PI601270	PHG29	1.31095	1.45181	6.87075	6.89153	2.73735	-0.776426	4.07316	3.12729	8.42739
PI601300	4676A	3.48084	1.74787	9.32851	9.95593	2.91064	-1.65692	3.06908	2.7953	10.7649
PI601301	78002A	3.425	0.913903	6.02259	6.76307	3.57318	-0.359355	5.78846	3.77807	9.42194
PI601316	LH54	3.01197	1.22425	6.57615	7.14635	2.12619	-0.803526	3.17783	2.59371	8.03318
PI601317	LH57	3.45555	1.27438	7.52343	8.18565	3.05155	-0.702554	2.70878	2.73851	9.12806
PI601318	PHG47	2.12418	2.72875	10.8244	11.2281	2.40173	-0.322513	3.6001	2.8862	12.0319
PI601319	PHG72	1.90934	1.38662	6.96958	7.13542	2.74923	-1.53229	3.51298	2.91798	8.36094
PI601320	PHG84	3.88792	1.43404	4.14701	5.53721	2.9287	-1.0955	2.83728	2.72738	6.80247
PI601321	PHJ40	2.54112	1.07622	5.75483	6.12346	2.26885	-0.70719	3.82265	2.92354	7.4968
PI601322	PHZ51	3.29034	0.811639	5.75318	6.41396	2.74864	0.159355	4.85496	3.42362	8.53188
PI601331	SX-6-3 (Tetraploid)	2.65298	1.94865	8.27296	8.69267	2.83537	0.161339	4.51129	3.32697	10.1742
PI601332	SX-6-7 (Tetraploid)	3.99892	1.7255	7.29061	8.2684	3.7215	0.130299	4.57662	3.53239	10.141
PI601360	LH52	3.70218	1.49344	6.54789	7.42957	2.36977	-0.644616	2.06057	2.14532	8.00138
PI601361	PHR36	3.20693	1.50079	6.27581	6.98851	2.27579	1.05776	4.14812	3.16472	8.55244
PI601362	PHW17	2.53611	1.97913	6.42207	6.93903	2.71457	0.682241	6.25659	3.84524	9.78839
PI601374	764	3.47409	0.943978	4.49537	5.49751	3.34116	-0.953618	3.81076	3.19603	7.42424
PI601375	778	2.74803	1.46991	6.67732	7.15869	2.47887	0.502753	5.23039	3.50867	9.21703
PI601377	794	4.16404	1.71124	5.97192	7.25294	3.46958	0.207893	6.23892	3.92272	10.1676
PI601378	LP5	3.10354	1.82194	6.16444	6.93326	3.95499	-0.427888	4.15932	3.4633	8.9853
PI601402	LH146Ht	2.53588	0.596725	2.55817	3.1303	3.03602	-0.0325101	4.36078	3.32214	6.14658
PI601403	LH156	2.48084	1.02556	4.53768	4.88956	2.66402	-0.126837	4.76179	3.36419	7.32462
PI601404	LH60	3.45989	0.993768	5.54532	6.34311	3.53577	-0.991556	3.491	3.15975	7.987
PI601405	LH85	3.00105	0.99457	7.00329	7.43912	1.63407	-2.1348	1.18622	0.961598	7.68058
PI601416	LH61	3.31632	1.3271	7.61448	8.21786	2.689	-0.989156	3.66825	2.96994	9.34119
PI601417	NS701	2.81608	1.58984	7.43191	7.89803	3.17683	-0.150055	4.91674	3.50681	9.80961
PI601430	807	5.50012	0.925412	6.49913	8.36909	3.37966	-1.36436	2.81203	2.89456	9.40677
PI601438	78371A	3.45394	1.33189	9.14405	9.68763	2.39541	-0.171308	4.71131	3.2872	11.0168
PI601439	FBHJ	2.89679	0.798431	5.18551	5.69928	2.54729	-1.85996	1.79081	2.11882	6.40689
PI601440	MBPM	3.13429	1.59887	6.83594	7.43383	NA	-0.0232634	4.23169	3.11768	8.82317
PI601441	PB80	2.60883	2.50442	7.18476	7.81676	3.48177	0.420621	5.39577	3.70963	10.1188
PI601442	PHG86	2.93692	1.59745	7.29061	7.80655	3.41095	0.358937	6.42306	3.9601	10.6885
PI601457	IB02	4.2105	0.89981	5.72965	6.93418	2.26758	-1.141	2.91196	2.50003	7.80501
PI601458	IBB15	1.44246	2.09163	6.63545	6.86599	1.83289	-1.50463	2.88381	2.42305	7.67573
PI601459	IBC2	1.89162	1.49498	7.02073	7.22041	2.44788	-1.61046	3.0388	2.61981	8.14022
PI601466	LH59	3.26899	1.26281	7.68046	8.23705	2.99309	-0.539993	3.55969	3.01719	9.44664
PI601467	PHK05	2.18063	0.816762	3.22177	3.55375	2.25481	-0.178408	2.57524	2.37962	4.88087
PI601468	PHK29	2.73115	1.21169	6.28547	6.69537	3.11836	-0.101261	4.4161	3.34226	8.61041
PI601469	PHR25	2.70128	0.834171	4.80247	5.2473	2.79897	-1.07459	4.00885	3.10224	7.08728
PI601470	PHV78	3.87664	1.29928	5.2971	6.40737	2.93844	-2.22689	2.19408	2.4509	7.31436
PI601489	740	3.80228	1.71001	7.66277	8.52393	2.9843	0.131877	4.83874	3.45422	10.2445
PI601490	787	1.87402	1.29805	6.23057	6.36443	2.58633	-0.843095	4.45892	3.23258	8.15418
PI601491	790	3.8365	0.869622	5.14064	6.23368	NA	-0.220187	5.88652	3.94225	9.52128
PI601492	793	3.68391	1.18042	5.22061	6.23174	4.00242	-0.651123	5.19061	3.73462	9.03112
PI601493	LH149	2.24628	0.676687	3.09983	3.4407	2.10485	-0.337907	5.29499	3.45519	6.61508
PI601494	LH65	2.98662	0.967534	5.18843	5.74612	2.75743	-1.97795	2.1858	2.3754	6.61931
PI601495	PHK42	1.92207	1.35744	7.98916	8.11414	2.50486	-1.07547	3.26097	2.73077	9.0511
PI601496	PHK76	2.61498	1.32356	6.269	6.69253	2.51251	-0.229612	3.99704	3.02378	8.09158
PI601497	PHN11	1.77523	0.90876	5.81458	5.87182	2.67279	-1.64477	3.19617	2.7571	7.16512
PI601498	PHT55	4.1995	0.770746	3.88713	5.47171	2.83371	-1.85446	2.83235	2.66478	6.69945
PI601499	PHT77	3.03401	0.995018	6.48066	6.99165	3.0536	0.0701732	5.02139	3.52941	9.15215
PI601500	PHV63	2.60008	0.965842	4.951	5.35957	3.16013	-0.0274401	5.09792	3.55566	8.03602
PI601501	PHW65	3.91808	1.43718	5.30407	6.4526	3.93196	-1.85857	1.66129	2.79648	7.63915
PI601502	W8304	2.41856	1.35929	5.37957	5.76427	3.15671	-0.298561	5.45029	3.64485	8.50795
PI601558	11430	3.57446	0.883509	6.12825	6.93923	3.56345	-1.72271	3.25485	3.08086	8.35615
PI601559	2369	3.03707	1.88955	5.94525	6.73826	4.42857	0.728802	6.64317	4.15918	10.4317
PI601560	2MA22	3.14686	1.96651	8.26623	8.85505	2.34893	0.0123846	5.82078	3.64894	10.8296
PI601561	6M502	3.78611	0.991669	5.74788	6.6997	2.94234	-2.12129	2.08951	2.39428	7.42052
PI601562	78551S	3.70219	1.43883	6.65897	7.54514	2.36726	0.241467	3.76491	2.96292	8.77191
PI601563	87916W	2.12295	1.03594	7.14477	7.3076	2.57304	0.632299	7.43892	4.12807	10.789
PI601564	HB8229	2.87657	1.07246	5.70201	6.20317	2.65673	-0.413373	2.60922	2.54328	7.21625
PI601565	IBB14	3.24142	0.998073	5.90459	6.56471	2.52375	-2.06605	2.26421	2.29104	7.32614
PI601566	MBST	2.81018	1.33345	8.44924	8.81677	2.63599	-0.637593	5.20454	3.49001	10.5464
PI601567	PHH93	1.80801	1.36539	6.45057	6.6056	2.02689	-1.53662	2.64716	2.27607	7.36104
PI601569	PHN47	1.84766	1.04143	5.57321	5.68603	2.07539	-1.5688	2.93682	2.448	6.60126
PI601570	PHP02	1.48243	1.24586	6.83876	6.86729	1.32955	-1.32479	3.09461	2.39742	7.64849
PI601572	PHR47	3.19845	1.48627	7.40177	7.99031	3.2627	-1.15753	3.3574	3.01805	9.17881
PI601573	PHT10	2.89244	1.08774	5.21493	5.76625	3.19172	-0.382994	4.2617	3.30352	7.85585
PI601574	PHT60	2.81669	1.14815	6.71264	7.12351	3.31638	-0.649946	4.67852	3.44874	9.10922
PI601575	PHW52	2.91857	1.21145	5.31846	5.89253	2.89987	-0.462908	4.94449	3.46042	8.23385
PI601576	PHW79	3.94043	0.852666	4.50084	5.7151	3.54233	-1.00966	3.50779	3.16015	7.52176
PI601583	NS501	1.43418	1.59882	7.32987	7.41519	2.69066	-1.10413	4.06936	3.1081	8.82013
PI601610	H8431	3.0866	1.40522	6.58498	7.1867	2.83225	-0.746398	4.41805	3.2735	8.87806
PI601611	S8324	3.59336	1.60848	7.04724	7.86242	2.88303	-0.114156	6.18634	3.82583	10.3821
PI601612	S8326	3.03376	1.32019	5.57392	6.18778	2.60369	0.345189	4.99201	3.43482	8.35927
PI601658	1538	1.80967	0.537698	3.24572	3.29281	2.28333	0.212833	4.54543	3.2373	6.0953
PI601683	CR14	2.50931	0.584789	2.18592	2.87679	2.74805	-0.711846	4.60905	3.32131	6.00544
PI601684	WIL900	2.17204	0.875224	2.41955	2.78565	2.08707	0.101203	5.2119	3.42915	6.25748
PI601685	WIL901	3.30871	0.97268	5.10625	5.85673	2.91011	-0.269171	3.76875	3.07967	7.52232
PI601686	WIL903	3.31105	1.2067	6.55309	7.19642	2.95135	0.617541	4.98964	3.51593	9.28134
PI601724	E8501	3.12308	1.20003	7.2527	7.83752	2.71598	-1.09355	3.89282	3.06042	9.12105
PI601725	J8606	3.30853	1.77439	6.36001	7.14988	2.81112	-0.568803	3.14718	2.79349	8.26601
PI601726	L 127	1.73214	1.43938	7.92063	8.03014	2.61915	-1.13301	3.74722	2.94512	9.16325
PI601727	L 135	1.82907	1.59988	8.18572	8.33957	2.25882	-0.968646	3.25386	2.67064	9.19416
PI601728	L 139	3.27276	1.03566	5.73016	6.42055	2.56915	-2.54529	2.46672	2.3941	7.27671
PI601729	W8555	2.81055	1.22471	6.22833	6.68144	3.56581	-0.371855	4.8019	3.54424	8.95242
PI601745	4N506	2.83393	0.988908	5.9589	6.4187	3.28906	-0.0445618	6.46463	3.93719	9.67631
PI601773	PHJ31	3.56471	1.61738	7.48429	8.23534	3.30841	0.616108	5.22793	3.71831	10.4342
PI601774	PHJ33	3.40545	0.985123	6.52384	7.19843	2.52439	-1.11733	3.47971	2.78268	8.27688
PI601775	PHJ70	3.17146	1.75777	7.20077	7.8535	2.93138	-0.305851	4.05045	3.18337	9.28983
PI601776	PHJ75	1.68729	1.20846	5.5097	5.60704	2.15769	-1.30297	3.81642	2.87949	7.03133
PI601777	PHK35	3.44391	1.14315	6.43253	7.14545	3.01861	-1.45366	3.82509	3.06256	8.52111
PI601778	PHM10	1.6052	1.82225	8.57176	8.69837	2.25065	-2.04231	3.02965	2.51446	9.43624
PI601779	PHM57	4.69907	1.35389	6.33712	7.78961	3.60188	-1.0102	2.75869	2.96866	8.96054
PI601780	PHN29	1.6613	2.11599	6.72171	7.00893	2.72547	-1.60813	4.01042	3.08066	8.41948
PI601781	PHN37	1.84148	1.15826	8.08862	8.18785	2.27108	-1.32557	4.09259	3.02398	9.38818
PI601782	PHN73	1.51132	1.38583	8.00378	8.09917	2.085	-0.0310509	4.3609	3.10356	9.41191
PI601783	PHN82	4.12417	1.04322	4.29471	5.82031	3.34218	-1.08821	2.44983	2.75732	7.08305
PI601784	PHP55	1.55611	1.26564	6.73378	6.80007	2.61121	-0.381211	3.98858	3.0706	8.22676
PI601786	PHR62	1.24154	1.97192	8.41447	8.52062	2.74642	-0.361181	3.17365	2.81137	9.48267
PI601787	PHR63	2.20041	1.08884	6.33754	6.52847	2.34176	-0.412894	4.54528	3.21914	8.26629
PI601788	PHT22	5.33979	1.37442	7.06977	8.76486	3.00974	-2.1916	1.87229	2.38202	9.37337
PI601789	PHV37	2.45708	0.876139	4.75343	5.14729	2.25176	-1.54799	2.48423	2.26985	6.05306
PI601790	PHW03	NA	1.15398	7.16315	8.75649	3.99298	0.0220476	5.63076	3.8483	11.1302
PI601791	PHW20	3.10261	1.27474	7.17062	7.69697	1.96381	-1.38593	2.82549	2.32908	8.37171
PI601792	PHW43	2.90816	1.28229	7.60302	8.02514	3.02444	-1.72956	2.516	2.64361	8.90673
PI601808	2FACC	3.1531	1.92092	6.71068	7.43585	4.51253	1.34609	6.0413	4.1344	10.8616
PI603939	B42	3.22441	1.10371	6.25016	6.88498	3.18498	0.649076	6.14879	3.87472	9.81969
PI604605	N522	3.93869	1.37072	6.09673	7.13245	2.51853	-0.576217	3.23233	2.75841	8.18989
PI604606	N527	4.50101	1.46882	6.68405	7.97406	3.18522	-0.504912	3.74121	3.13906	9.3247
PI606329	DE1	1.56537	1.42111	8.11699	8.17802	2.36714	-0.499126	4.10336	3.05928	9.41899
PI606330	DE2	1.55915	1.46507	7.99311	8.01771	2.57365	-0.511498	4.19073	3.13374	9.4009
PI606768	SD40	1.25731	1.47211	8.39335	8.41167	2.51068	-0.81843	4.7848	3.31969	9.9694
PI606769	SD41	1.75997	1.35877	7.81775	7.97229	2.21766	-0.686585	3.98607	2.97482	9.15051
PI607512	N7A	1.80717	1.19327	5.92412	6.02417	2.1813	-0.950391	4.49682	3.17319	7.84038
PI607519	ND240	3.75096	1.45028	6.98151	7.85549	3.13997	0.378781	4.04072	3.25614	9.40154
PI607521	A661	2.01345	1.28521	9.38265	9.52012	2.5363	0.201235	6.11514	3.77193	11.6188
PI607522	A662	3.12105	1.39041	7.65939	8.21465	2.75066	-0.216887	4.47454	3.29024	9.75128
PI607523	A663	1.55824	1.24476	6.57853	6.61216	2.02562	-0.0250572	3.31021	2.65162	7.64308
PI607524	A664	3.37175	1.03415	6.06101	6.75369	2.89093	-1.90466	3.16077	2.82745	7.9282
PI607525	A665	3.75277	0.909331	4.68283	5.8582	3.62168	0.0241579	3.42405	3.19136	7.68867
PI607527	ND300	2.85339	1.17922	7.4793	7.88755	1.26309	-0.636615	3.18521	2.4719	8.62754
PI608764	B55	2.57305	1.16844	6.75378	7.10096	2.57384	-0.453562	4.79237	3.35302	8.91109
PI608765	B77	2.38284	1.48681	6.65882	6.98421	2.3918	-0.840085	3.60782	2.84857	8.15021
PI608766	B79	2.89008	0.953983	5.627	6.10393	2.20624	-1.30527	3.54616	2.7497	7.31088
PI608767	B84	3.07307	1.55595	7.80898	8.33149	3.19088	-1.36863	2.51343	2.7005	9.23045
PI608768	B87	1.50997	2.75148	7.77844	8.19085	2.64942	0.104075	3.5496	2.94549	9.31853
PI608774	B75	2.59335	1.24578	6.63421	7.00472	1.99897	-1.34213	3.00764	2.44308	7.81971
PI608777	B85	3.44467	0.714441	3.69919	4.7531	2.80424	0.911086	4.9976	3.5093	7.5171
PI608778	B86	3.56366	1.32004	7.74679	8.40603	3.04006	-0.467076	3.83556	3.12767	9.69455
PI610493	NY5526	2.08452	2.21803	7.98884	8.32909	2.10683	0.538081	6.28415	3.80417	10.6764
PI610494	NY6371	2.56162	1.96451	10.0053	10.3456	1.81631	-0.476163	5.20574	3.37811	11.7098
PI631393	ND291	2.45117	1.06247	6.3924	6.69683	2.40552	-1.06804	3.26919	2.69404	7.77391
PI631394	ND2000	1.5583	0.596684	4.20847	4.16168	1.62008	-2.52808	1.81036	1.43104	4.70581
PI631444	T270	3.48047	1.72555	7.61145	8.34171	4.37968	-0.00938806	4.90746	3.74813	10.5931
PI633839	Tx114	3.32477	1.53459	7.16429	7.83538	3.79707	0.361173	5.61625	3.82013	10.371
PI633840	Tx714	2.45851	2.1407	6.0912	6.65715	3.21502	0.11254	5.52805	3.70067	9.25922
PI633924	T272	4.28619	0.958958	4.85904	6.29211	3.42719	-1.50887	2.32066	2.89404	7.573
PI634206	Mo48	2.79426	1.2306	5.47087	5.97429	3.72191	-1.36467	5.27282	3.69383	8.7082
PI634207	Mo49	3.4177	1.76299	6.5666	7.36241	3.02955	-0.777811	3.48162	2.95318	8.56814
PI638549	N551	3.53671	1.53659	6.95212	7.71267	4.04486	-0.411477	4.53763	3.50123	9.64115
PI638550	N552	1.75142	1.47162	9.61866	9.70572	2.62586	-0.0419153	5.20898	3.50158	11.339
PI638551	DE3	3.48445	1.3108	6.31274	7.11149	3.18772	-1.22741	2.89798	2.8535	8.2449
PI638594	T175	3.03065	1.68616	6.55236	7.18753	2.53239	0.211493	4.27621	3.19332	8.7591
PI639111	Oh605	2.98761	1.98276	7.99015	8.56956	2.31193	-1.93982	3.32714	2.69446	9.40674
PI639931	TZSTRI107	2.89677	2.86561	6.59532	7.53296	3.34947	0.330084	3.53825	3.15145	8.95636
PI639936	TZSTRI112	1.76643	1.27933	4.85611	5.00497	1.79408	-2.23876	2.09502	1.82031	5.61292
PI639937	TZSTRI113	1.79942	3.16283	10.0321	10.5065	1.73959	0.0818152	3.07498	2.47672	11.0567
PI639938	TZSTRI114	2.64693	1.50578	4.90764	5.47002	2.96485	-0.125849	2.55262	2.65522	6.66837
PI641070	TZEI 10	2.75273	1.17351	4.83802	5.38707	2.46631	-0.110961	4.11037	3.0877	7.1676
PI641071	TZEI 11	2.57932	1.01021	3.90876	4.43733	2.34273	-1.41425	2.81264	2.48247	5.61423
PI641072	TZEI 12	1.9411	1.56275	6.17764	6.41417	2.20066	-1.29338	2.85293	2.45942	7.28556
PI641226	Hi44	3.01671	1.09777	6.31445	6.84835	3.1519	0.66191	5.7891	3.77701	9.50209
PI641229	Hi47	3.83757	1.4669	5.98506	7.03899	4.12609	-0.228007	5.01414	3.71673	9.51941
PI641238	Hi56	2.49648	1.05982	6.64373	6.93418	2.19742	1.53332	7.89541	4.24901	10.8532
PI641242	Hi60	3.44906	1.41668	7.08086	7.78364	2.73967	-0.925423	3.23169	2.8129	8.84557
PI641243	Hi61	1.5581	1.47601	6.40144	6.50106	2.5147	-1.54149	3.6324	2.88539	7.77104
PI641249	Hi67	1.78852	0.935742	4.70726	4.79411	2.56544	-1.39066	2.71959	2.50438	5.95597
PI641253	TZEEI 3	3.18838	1.89849	8.77017	9.34755	3.79583	0.301384	4.21117	3.4601	10.9197
PI641254	TZEEI 4	2.75076	1.59194	7.33029	7.76422	2.33366	-0.330086	2.86431	2.53833	8.5523
PI641256	TZEEI 6	1.72359	0.94449	4.65765	4.69097	2.64296	0.350823	4.65175	3.32241	7.07119
PI644101	LH1	1.86105	1.28524	7.42273	7.54669	2.74172	-0.214509	5.18819	3.51316	9.54124
PI648423	58611 Inbred A632	3.09814	0.857546	5.06033	5.74696	3.12339	-1.43915	2.9394	2.82721	7.11921
PI648424	58609 A632 (Meth) Bc5S4	2.63763	0.801555	4.21408	4.75413	3.12286	-1.38407	2.81184	2.78044	6.23128
PI648425	58610 A632 (Meth) Bc5S4	3.19607	0.750633	4.58749	5.35983	3.51851	-1.58297	3.07645	3.00705	7.01413
PI648426	58612 Inbred B73	2.5119	2.19233	6.64366	7.20502	2.76136	0.345616	6.23905	3.83442	9.91356
PI648427	58613 B73 (Meth) Bc5S4	2.3772	1.7273	6.02224	6.46909	2.72067	0.145893	5.4711	3.60776	8.88549
PI648428	58614 B73 (Meth) Bc5S4	2.36711	2.2872	6.10348	6.71007	3.12161	0.509842	6.1383	3.85877	9.62801
PI648429	58615 B73 (Meth) Bc5S4	2.83312	2.52488	7.25737	7.98766	3.57316	0.0337062	5.89057	3.84447	10.5903
PI648430	58801 Inbred Mo17	2.89477	1.23957	6.26767	6.76896	2.48851	-0.966489	3.51683	2.85176	7.96994
PI648432	58803 Mo17 (Meth) BcS3	3.53293	1.35705	6.95266	7.76777	2.69283	-0.837744	3.27057	2.81471	8.8152
PI654048	TZAR101	3.68259	1.31925	6.10886	7.02308	2.7634	0.276458	3.26857	2.89061	8.18993
